# Supplementary material
Source: PubMed Central journal article supplement (PMC3522160)
Supplement: 4a69eda61f30cf3b432905d97de43acb_genetics.112.144436-7.pdf [file 4a69eda61f30cf3b432905d97de43acb_genetics.112.144436-7.pdf]

**Table S3 Comparison of two *dw3* homoeologous genes**

|                                      | Identity |
|--------------------------------------|----------|
| Gene level                           | 0.916    |
| Coding region                        | 0.948    |
| Noncoding region                     | 0.667    |
| Protein level                        | 0.941    |
| dN (nonsynonymous substitution rate) | 0.033    |
| dS (synonymous substitution rate)    | 0.125    |
