# Supplementary material
Source: PubMed Central journal article supplement (PMC3522160)
Supplement: 8afb4bb14be08254b2dd0dfb32b6333a_genetics.112.144436-3.pdf [file 8afb4bb14be08254b2dd0dfb32b6333a_genetics.112.144436-3.pdf]

**Table S6 Comparison of expected and observed types of mutations**

|            | <i>dw3</i> |          | <i>rht1</i> |          |
|------------|------------|----------|-------------|----------|
|            | Expected   | Observed | Expected    | Observed |
| Missense   | 50.36%     | 70.18%   | 57.14%      | 50.00%   |
| Silent     | 46.59%     | 27.19%   | 41.35%      | 50.00%   |
| Stop codon | 3.05%      | 2.63%    | 1.50%       |          |
