# Supplementary material
Source: PubMed Central journal article supplement (PMC3522160)
Supplement: 83df31ffcab538b9c76b5db3bfd54e3b_genetics.112.144436-2.pdf [file 83df31ffcab538b9c76b5db3bfd54e3b_genetics.112.144436-2.pdf]

**Table S1 Summary of tef genomic fosmid library**

---

|                                      |                       |
|--------------------------------------|-----------------------|
| Accession number                     | PI 524434             |
| Source of genomic DNA                | 1-month-old seedlings |
| Total number of colony forming units | 102,191               |
| Number of superpools                 | 25                    |
| Number of pools                      | 1,187                 |
| Average insert size                  | 35 kb – 45kb          |
| Haploid genome size                  | 714Mbp                |
| Library coverage                     | 5.0X – 6.4X           |

---
