# Supplementary material
Source: PubMed Central journal article supplement (PMC3522160)
Supplement: 203af28cb15ef26c9b7d7d78e822982f_genetics.112.144436-1.pdf [file 203af28cb15ef26c9b7d7d78e822982f_genetics.112.144436-1.pdf]

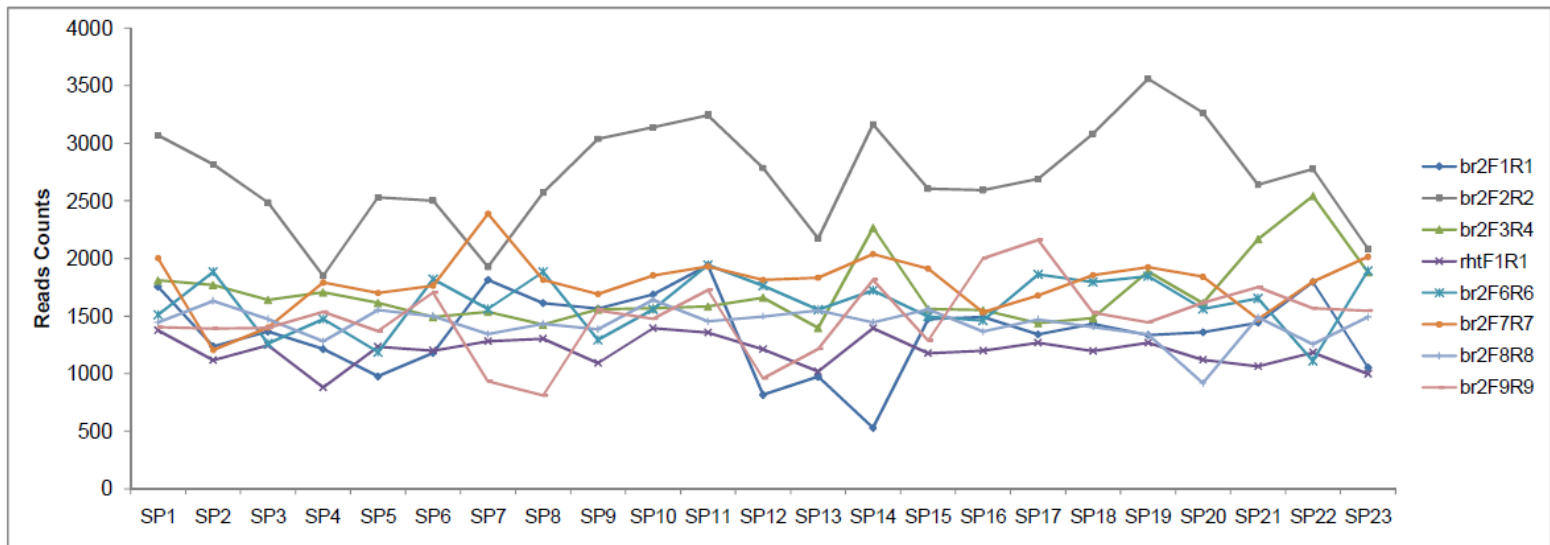

**Figure S1** 454 read distribution of 8 amplicons in the 23 superpools. X axis represents 23 superpools from the 21,210 EMS mutagenized *tef* lines. Y axis represents the number of reads in the superpools. 8 different signs represent 8 amplicons. Among them, *rhtF1R1* was amplified from *rht1* genes and the other 7 were amplified from *dw3* genes

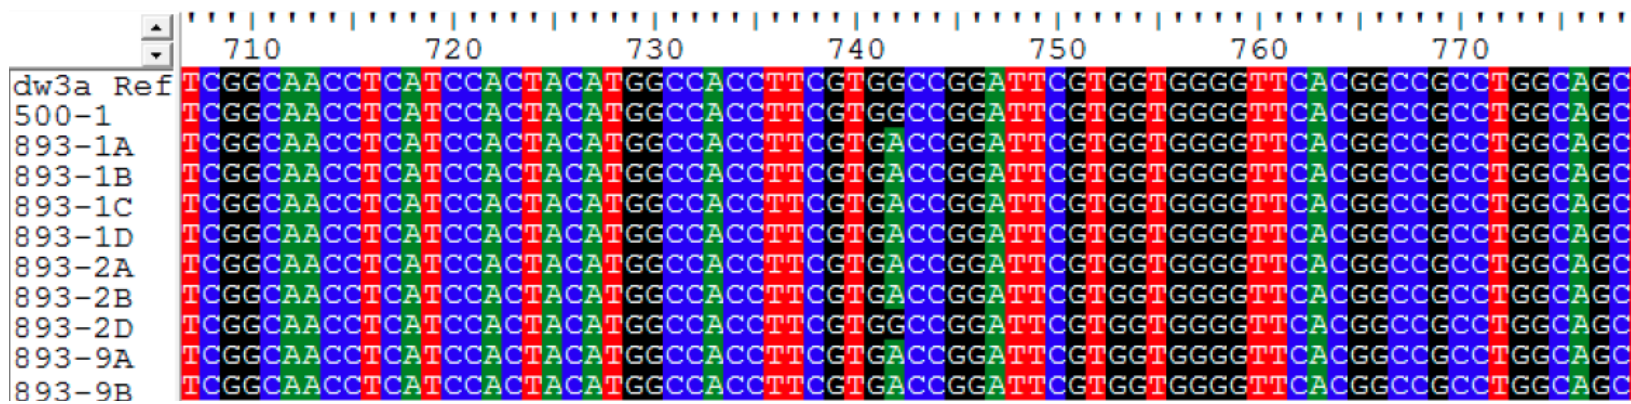

A)

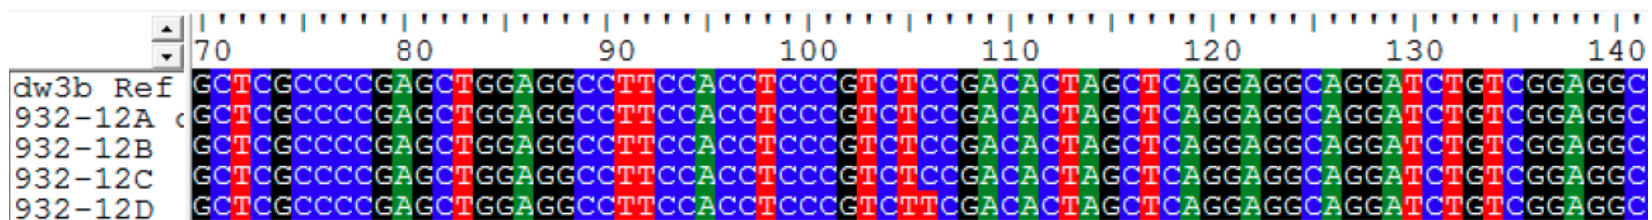

B)

**Figure S2** Sanger sequencing validation on M3 generation plants segregating for mutations in a candidate *tef* dwarfing gene. A) p893 mutant alignment with reference sequence of *dw3a* gene. The G742A mutation is validated by seven p893 M3 lines; B) p932 mutant alignment with reference sequence of the *dw3b* gene. The C106T mutation is validated by one p932 M3 line, 932-12D

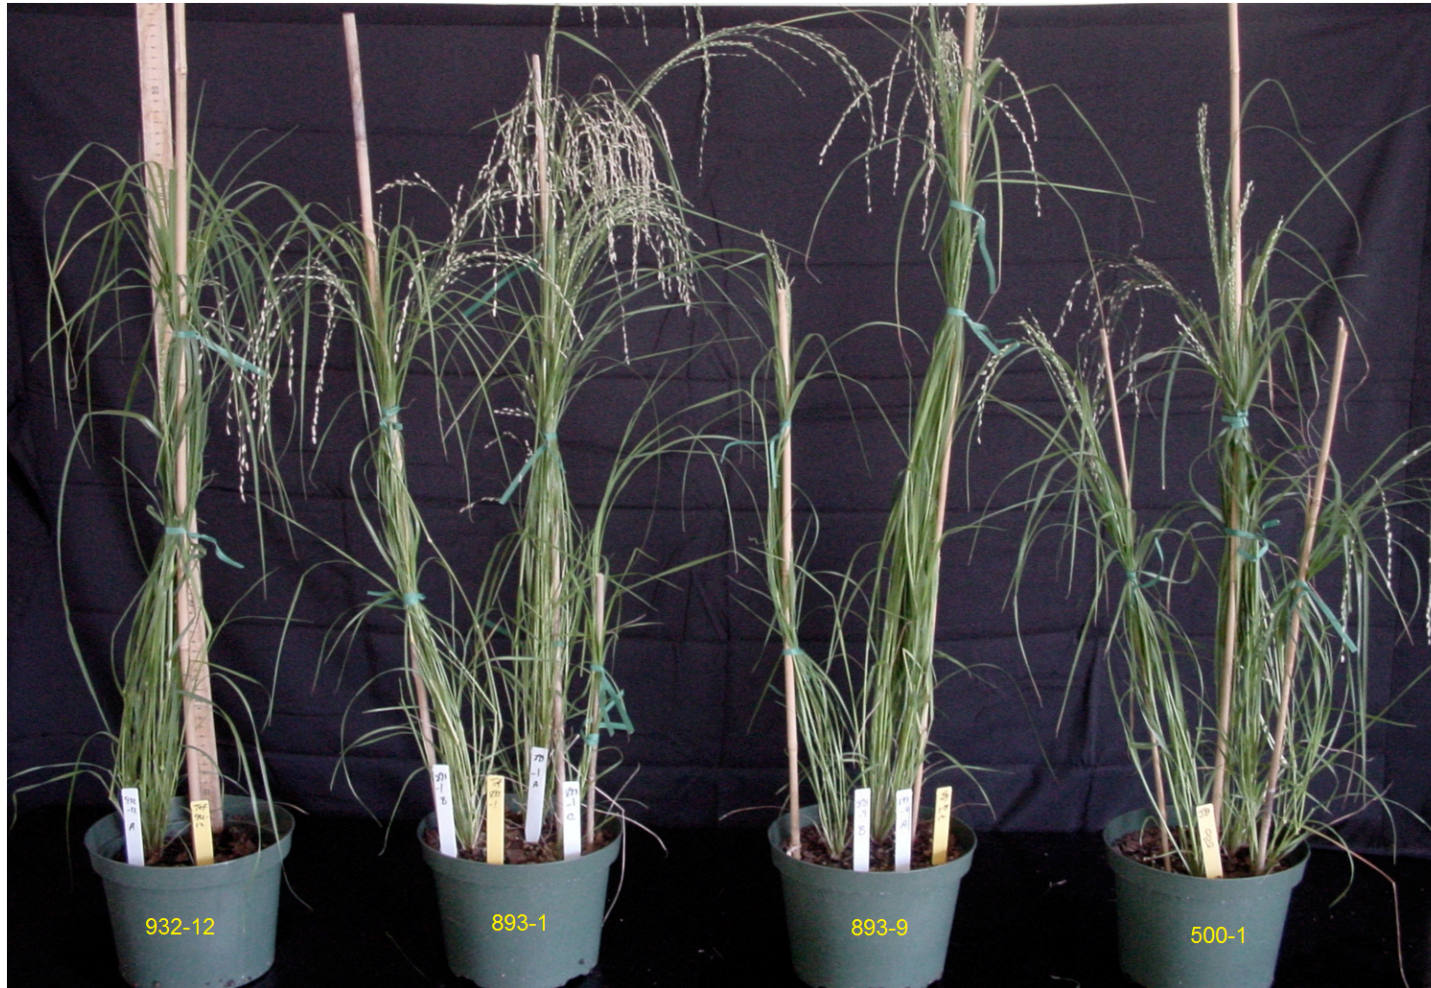

**Figure S3** Phenotypes of *dw3* homologue mutants in M3 lines of *tef* (500-1: control; 893-1 and 893-9: G742A mutants; 932-12: C106T mutant)

**Table S1 Summary of tef genomic fosmid library**

---

|                                      |                       |
|--------------------------------------|-----------------------|
| Accession number                     | PI 524434             |
| Source of genomic DNA                | 1-month-old seedlings |
| Total number of colony forming units | 102,191               |
| Number of superpools                 | 25                    |
| Number of pools                      | 1,187                 |
| Average insert size                  | 35 kb – 45kb          |
| Haploid genome size                  | 714Mbp                |
| Library coverage                     | 5.0X – 6.4X           |

---

**Table S2 Primers for 454 sequencing**

| Primer name      | Fusion primer (5'-3')          | MID_Tag    | PCR primer (5'-3')     |
|------------------|--------------------------------|------------|------------------------|
| dw3E1F1_SP1_FA   | CCATCTCATCCCTGCGTGTCTCCGACTCAG | ACGAGTGC   | CTAGYAGCGACCCGGAGGAGAT |
| dw3E1F1_SP2_FA   | CCATCTCATCCCTGCGTGTCTCCGACTCAG | AGACGCAC   | CTAGYAGCGACCCGGAGGAGAT |
| dw3E1F1_SP3_FA   | CCATCTCATCCCTGCGTGTCTCCGACTCAG | AGCACTGT   | CTAGYAGCGACCCGGAGGAGAT |
| dw3E1F1_SP4_FA   | CCATCTCATCCCTGCGTGTCTCCGACTCAG | CTCGCGTG   | CTAGYAGCGACCCGGAGGAGAT |
| dw3E1F1_SP5_FA   | CCATCTCATCCCTGCGTGTCTCCGACTCAG | TGATACGT   | CTAGYAGCGACCCGGAGGAGAT |
| dw3E1F1_SP6_FA   | CCATCTCATCCCTGCGTGTCTCCGACTCAG | CATAGTAG   | CTAGYAGCGACCCGGAGGAGAT |
| dw3E1F1_SP7_FA   | CCATCTCATCCCTGCGTGTCTCCGACTCAG | CGAGAGAT   | CTAGYAGCGACCCGGAGGAGAT |
| dw3E1F1_SP8_FA   | CCATCTCATCCCTGCGTGTCTCCGACTCAG | CGTCTAGT   | CTAGYAGCGACCCGGAGGAGAT |
| dw3E1F1_SP9_FA   | CCATCTCATCCCTGCGTGTCTCCGACTCAG | TGTACTAC   | CTAGYAGCGACCCGGAGGAGAT |
| dw3E1F1_SP10_FA  | CCATCTCATCCCTGCGTGTCTCCGACTCAG | CGTAGACT   | CTAGYAGCGACCCGGAGGAGAT |
| dw3E1F1_SP11_FA  | CCATCTCATCCCTGCGTGTCTCCGACTCAG | TACGAGTA   | CTAGYAGCGACCCGGAGGAGAT |
| dw3E1F1_SP12_FA  | CCATCTCATCCCTGCGTGTCTCCGACTCAG | TACTCTCG   | CTAGYAGCGACCCGGAGGAGAT |
| dw3E1F1_SP13_FA  | CCATCTCATCCCTGCGTGTCTCCGACTCAG | TAGAGACG   | CTAGYAGCGACCCGGAGGAGAT |
| dw3E1F1_SP14_FA  | CCATCTCATCCCTGCGTGTCTCCGACTCAG | ACTGTACA   | CTAGYAGCGACCCGGAGGAGAT |
| dw3E1F1_SP15_FA  | CCATCTCATCCCTGCGTGTCTCCGACTCAG | ATAGAGTA   | CTAGYAGCGACCCGGAGGAGAT |
| dw3E1F1_SP16_FA  | CCATCTCATCCCTGCGTGTCTCCGACTCAG | CACGCTAC   | CTAGYAGCGACCCGGAGGAGAT |
| dw3E1F1_SP17_FA  | CCATCTCATCCCTGCGTGTCTCCGACTCAG | CAGTAGAC   | CTAGYAGCGACCCGGAGGAGAT |
| dw3E1F1_SP18_FA  | CCATCTCATCCCTGCGTGTCTCCGACTCAG | CGACGTGA   | CTAGYAGCGACCCGGAGGAGAT |
| dw3E1F1_SP19_FA  | CCATCTCATCCCTGCGTGTCTCCGACTCAG | TCGATCAC   | CTAGYAGCGACCCGGAGGAGAT |
| dw3E1F1_SP20_FA  | CCATCTCATCCCTGCGTGTCTCCGACTCAG | TCGACTA    | CTAGYAGCGACCCGGAGGAGAT |
| dw3E1F1_SP21_FA  | CCATCTCATCCCTGCGTGTCTCCGACTCAG | AGTCGAGA   | CTAGYAGCGACCCGGAGGAGAT |
| dw3E1F1_SP22_FA  | CCATCTCATCCCTGCGTGTCTCCGACTCAG | CGCAGTAC   | CTAGYAGCGACCCGGAGGAGAT |
| dw3E1F1_SP23_FA  | CCATCTCATCCCTGCGTGTCTCCGACTCAG | TATGCTAG   | CTAGYAGCGACCCGGAGGAGAT |
| dw3E1R1a_FB      | CCTATCCCCTGTGTGCCCTGGCAGTCTCAG |            | ACYTGGCCACCAGCCGCACCA  |
| dw3E1R2a_SP1_FA  | CCATCTCATCCCTGCGTGTCTCCGACTCAG | ACGAGTGCCT | TGGCTCCGCGACGACAGCTT   |
| dw3E1R2a_SP2_FA  | CCATCTCATCCCTGCGTGTCTCCGACTCAG | AGACGCACTC | TGGCTCCGCGACGACAGCTT   |
| dw3E1R2a_SP3_FA  | CCATCTCATCCCTGCGTGTCTCCGACTCAG | AGCACTGTAG | TGGCTCCGCGACGACAGCTT   |
| dw3E1R2a_SP4_FA  | CCATCTCATCCCTGCGTGTCTCCGACTCAG | CTCGCGTGTC | TGGCTCCGCGACGACAGCTT   |
| dw3E1R2a_SP5_FA  | CCATCTCATCCCTGCGTGTCTCCGACTCAG | TGATACGTCT | TGGCTCCGCGACGACAGCTT   |
| dw3E1R2a_SP6_FA  | CCATCTCATCCCTGCGTGTCTCCGACTCAG | CATAGTAGTG | TGGCTCCGCGACGACAGCTT   |
| dw3E1R2a_SP7_FA  | CCATCTCATCCCTGCGTGTCTCCGACTCAG | CGAGAGATAC | TGGCTCCGCGACGACAGCTT   |
| dw3E1R2a_SP8_FA  | CCATCTCATCCCTGCGTGTCTCCGACTCAG | CGTCTAGTAC | TGGCTCCGCGACGACAGCTT   |
| dw3E1R2a_SP9_FA  | CCATCTCATCCCTGCGTGTCTCCGACTCAG | TGTACTACTC | TGGCTCCGCGACGACAGCTT   |
| dw3E1R2a_SP10_FA | CCATCTCATCCCTGCGTGTCTCCGACTCAG | CGTAGACTAG | TGGCTCCGCGACGACAGCTT   |
| dw3E1R2a_SP11_FA | CCATCTCATCCCTGCGTGTCTCCGACTCAG | TACGAGTATG | TGGCTCCGCGACGACAGCTT   |
| dw3E1R2a_SP12_FA | CCATCTCATCCCTGCGTGTCTCCGACTCAG | TACTCTCGTG | TGGCTCCGCGACGACAGCTT   |

|                  |                                |             |                         |
|------------------|--------------------------------|-------------|-------------------------|
| dw3E1R2a_SP13_FA | CCATCTCATCCCTGCGTGTCTCCGACTCAG | TAGAGACGAG  | TGGCTCCGCGACGACAGCTT    |
| dw3E1R2a_SP14_FA | CCATCTCATCCCTGCGTGTCTCCGACTCAG | ACTGTACAGT  | TGGCTCCGCGACGACAGCTT    |
| dw3E1R2a_SP15_FA | CCATCTCATCCCTGCGTGTCTCCGACTCAG | ATAGAGTACT  | TGGCTCCGCGACGACAGCTT    |
| dw3E1R2a_SP16_FA | CCATCTCATCCCTGCGTGTCTCCGACTCAG | CACGCTACGT  | TGGCTCCGCGACGACAGCTT    |
| dw3E1R2a_SP17_FA | CCATCTCATCCCTGCGTGTCTCCGACTCAG | CAGTAGACGT  | TGGCTCCGCGACGACAGCTT    |
| dw3E1R2a_SP18_FA | CCATCTCATCCCTGCGTGTCTCCGACTCAG | CGACGTGACT  | TGGCTCCGCGACGACAGCTT    |
| dw3E1R2a_SP19_FA | CCATCTCATCCCTGCGTGTCTCCGACTCAG | TCGATCACGT  | TGGCTCCGCGACGACAGCTT    |
| dw3E1R2a_SP20_FA | CCATCTCATCCCTGCGTGTCTCCGACTCAG | TCGCACTAGT  | TGGCTCCGCGACGACAGCTT    |
| dw3E1R2a_SP21_FA | CCATCTCATCCCTGCGTGTCTCCGACTCAG | AGTCGAGAGA  | TGGCTCCGCGACGACAGCTT    |
| dw3E1R2a_SP22_FA | CCATCTCATCCCTGCGTGTCTCCGACTCAG | CGCAGTACGA  | TGGCTCCGCGACGACAGCTT    |
| dw3E1R2a_SP23_FA | CCATCTCATCCCTGCGTGTCTCCGACTCAG | TATGCTAGTA  | TGGCTCCGCGACGACAGCTT    |
| dw3E1F2a_FB      | CCTATCCCCTGTGTGCCCTGGCAGTCTCAG |             | ATGGTGC GGCTGGTGCCARG   |
| dw3E1R4_SP1_FA   | CCATCTCATCCCTGCGTGTCTCCGACTCAG | ACGAGTGC    | GTGACGGGTAGGCCGAAGTCAAC |
| dw3E1R4_SP2_FA   | CCATCTCATCCCTGCGTGTCTCCGACTCAG | AGACGCAC    | GTGACGGGTAGGCCGAAGTCAAC |
| dw3E1R4_SP3_FA   | CCATCTCATCCCTGCGTGTCTCCGACTCAG | AGCACTGT    | GTGACGGGTAGGCCGAAGTCAAC |
| dw3E1R4_SP4_FA   | CCATCTCATCCCTGCGTGTCTCCGACTCAG | CTCGCGTG    | GTGACGGGTAGGCCGAAGTCAAC |
| dw3E1R4_SP5_FA   | CCATCTCATCCCTGCGTGTCTCCGACTCAG | TGATACGT    | GTGACGGGTAGGCCGAAGTCAAC |
| dw3E1R4_SP6_FA   | CCATCTCATCCCTGCGTGTCTCCGACTCAG | CATAGTAG    | GTGACGGGTAGGCCGAAGTCAAC |
| dw3E1R4_SP7_FA   | CCATCTCATCCCTGCGTGTCTCCGACTCAG | CGAGAGAT    | GTGACGGGTAGGCCGAAGTCAAC |
| dw3E1R4_SP8_FA   | CCATCTCATCCCTGCGTGTCTCCGACTCAG | CGTCTAGT    | GTGACGGGTAGGCCGAAGTCAAC |
| dw3E1R4_SP9_FA   | CCATCTCATCCCTGCGTGTCTCCGACTCAG | TGTACTAC    | GTGACGGGTAGGCCGAAGTCAAC |
| dw3E1R4_SP10_FA  | CCATCTCATCCCTGCGTGTCTCCGACTCAG | CGTAGACT    | GTGACGGGTAGGCCGAAGTCAAC |
| dw3E1R4_SP11_FA  | CCATCTCATCCCTGCGTGTCTCCGACTCAG | TACGAGTA    | GTGACGGGTAGGCCGAAGTCAAC |
| dw3E1R4_SP12_FA  | CCATCTCATCCCTGCGTGTCTCCGACTCAG | TACTCTCG    | GTGACGGGTAGGCCGAAGTCAAC |
| dw3E1R4_SP13_FA  | CCATCTCATCCCTGCGTGTCTCCGACTCAG | TAGAGACG    | GTGACGGGTAGGCCGAAGTCAAC |
| dw3E1R4_SP14_FA  | CCATCTCATCCCTGCGTGTCTCCGACTCAG | ACTGTACA    | GTGACGGGTAGGCCGAAGTCAAC |
| dw3E1R4_SP15_FA  | CCATCTCATCCCTGCGTGTCTCCGACTCAG | ATAGAGTA    | GTGACGGGTAGGCCGAAGTCAAC |
| dw3E1R4_SP16_FA  | CCATCTCATCCCTGCGTGTCTCCGACTCAG | CACGCTAC    | GTGACGGGTAGGCCGAAGTCAAC |
| dw3E1R4_SP17_FA  | CCATCTCATCCCTGCGTGTCTCCGACTCAG | CAGTAGAC    | GTGACGGGTAGGCCGAAGTCAAC |
| dw3E1R4_SP18_FA  | CCATCTCATCCCTGCGTGTCTCCGACTCAG | CGACGTGA    | GTGACGGGTAGGCCGAAGTCAAC |
| dw3E1R4_SP19_FA  | CCATCTCATCCCTGCGTGTCTCCGACTCAG | TCGATCAC    | GTGACGGGTAGGCCGAAGTCAAC |
| dw3E1R4_SP20_FA  | CCATCTCATCCCTGCGTGTCTCCGACTCAG | TCGCACTA    | GTGACGGGTAGGCCGAAGTCAAC |
| dw3E1R4_SP21_FA  | CCATCTCATCCCTGCGTGTCTCCGACTCAG | AGTCGAGA    | GTGACGGGTAGGCCGAAGTCAAC |
| dw3E1R4_SP22_FA  | CCATCTCATCCCTGCGTGTCTCCGACTCAG | CGCAGTAC    | GTGACGGGTAGGCCGAAGTCAAC |
| dw3E1R4_SP23_FA  | CCATCTCATCCCTGCGTGTCTCCGACTCAG | TATGCTAG    | GTGACGGGTAGGCCGAAGTCAAC |
| dw3E1F3a_FB      | CCTATCCCCTGTGTGCCCTGGCAGTCTCAG |             | AAGCTGTGCTCGCGGAGCCA    |
| rht1F1_SP1_FA    | CCATCTCATCCCTGCGTGTCTCCGACTCAG | ACGAGTGC GT | AAGGACAAGATGATGGTGCC    |
| rht1F1_SP2_FA    | CCATCTCATCCCTGCGTGTCTCCGACTCAG | AGACGCACTC  | AAGGACAAGATGATGGTGCC    |
| rht1F1_SP3_FA    | CCATCTCATCCCTGCGTGTCTCCGACTCAG | AGCACTGTAG  | AAGGACAAGATGATGGTGCC    |

|                 |                                |            |                        |
|-----------------|--------------------------------|------------|------------------------|
| rht1F1_SP4_FA   | CCATCTCATCCCTGCGTGTCTCCGACTCAG | CTCGCGTGTC | AAGGACAAGATGATGGTGCC   |
| rht1F1_SP5_FA   | CCATCTCATCCCTGCGTGTCTCCGACTCAG | TGATACGTCT | AAGGACAAGATGATGGTGCC   |
| rht1F1_SP6_FA   | CCATCTCATCCCTGCGTGTCTCCGACTCAG | CATAGTAGTG | AAGGACAAGATGATGGTGCC   |
| rht1F1_SP7_FA   | CCATCTCATCCCTGCGTGTCTCCGACTCAG | CGAGAGATAC | AAGGACAAGATGATGGTGCC   |
| rht1F1_SP8_FA   | CCATCTCATCCCTGCGTGTCTCCGACTCAG | CGTCTAGTAC | AAGGACAAGATGATGGTGCC   |
| rht1F1_SP9_FA   | CCATCTCATCCCTGCGTGTCTCCGACTCAG | TGTACTACTC | AAGGACAAGATGATGGTGCC   |
| rht1F1_SP10_FA  | CCATCTCATCCCTGCGTGTCTCCGACTCAG | CGTAGACTAG | AAGGACAAGATGATGGTGCC   |
| rht1F1_SP11_FA  | CCATCTCATCCCTGCGTGTCTCCGACTCAG | TACGAGTATG | AAGGACAAGATGATGGTGCC   |
| rht1F1_SP12_FA  | CCATCTCATCCCTGCGTGTCTCCGACTCAG | TACTCTCGTG | AAGGACAAGATGATGGTGCC   |
| rht1F1_SP13_FA  | CCATCTCATCCCTGCGTGTCTCCGACTCAG | TAGAGACGAG | AAGGACAAGATGATGGTGCC   |
| rht1F1_SP14_FA  | CCATCTCATCCCTGCGTGTCTCCGACTCAG | ACTGTACAGT | AAGGACAAGATGATGGTGCC   |
| rht1F1_SP15_FA  | CCATCTCATCCCTGCGTGTCTCCGACTCAG | ATAGAGTACT | AAGGACAAGATGATGGTGCC   |
| rht1F1_SP16_FA  | CCATCTCATCCCTGCGTGTCTCCGACTCAG | CACGCTACGT | AAGGACAAGATGATGGTGCC   |
| rht1F1_SP17_FA  | CCATCTCATCCCTGCGTGTCTCCGACTCAG | CAGTAGACGT | AAGGACAAGATGATGGTGCC   |
| rht1F1_SP18_FA  | CCATCTCATCCCTGCGTGTCTCCGACTCAG | CGACGTGACT | AAGGACAAGATGATGGTGCC   |
| rht1F1_SP19_FA  | CCATCTCATCCCTGCGTGTCTCCGACTCAG | TCGATCACGT | AAGGACAAGATGATGGTGCC   |
| rht1F1_SP20_FA  | CCATCTCATCCCTGCGTGTCTCCGACTCAG | TCGCACTAGT | AAGGACAAGATGATGGTGCC   |
| rht1F1_SP21_FA  | CCATCTCATCCCTGCGTGTCTCCGACTCAG | AGTCGAGAGA | AAGGACAAGATGATGGTGCC   |
| rht1F1_SP22_FA  | CCATCTCATCCCTGCGTGTCTCCGACTCAG | CGCAGTACGA | AAGGACAAGATGATGGTGCC   |
| rht1F1_SP23_FA  | CCATCTCATCCCTGCGTGTCTCCGACTCAG | TATGCTAGTA | AAGGACAAGATGATGGTGCC   |
| rht1R1_FB       | CCTATCCCCTGTGTGCCTTGGCAGTCTCAG |            | GAAGACGAGGACGAGGAAGA   |
| dw3E2R1_SP1_FA  | CCATCTCATCCCTGCGTGTCTCCGACTCAG | ACGAGTGC   | GCAGCTTGATGATGAATGAGTG |
| dw3E2R1_SP2_FA  | CCATCTCATCCCTGCGTGTCTCCGACTCAG | AGACGCAC   | GCAGCTTGATGATGAATGAGTG |
| dw3E2R1_SP3_FA  | CCATCTCATCCCTGCGTGTCTCCGACTCAG | AGCACTGT   | GCAGCTTGATGATGAATGAGTG |
| dw3E2R1_SP4_FA  | CCATCTCATCCCTGCGTGTCTCCGACTCAG | CTCGCGTG   | GCAGCTTGATGATGAATGAGTG |
| dw3E2R1_SP5_FA  | CCATCTCATCCCTGCGTGTCTCCGACTCAG | TGATACGT   | GCAGCTTGATGATGAATGAGTG |
| dw3E2R1_SP6_FA  | CCATCTCATCCCTGCGTGTCTCCGACTCAG | CATAGTAG   | GCAGCTTGATGATGAATGAGTG |
| dw3E2R1_SP7_FA  | CCATCTCATCCCTGCGTGTCTCCGACTCAG | CGAGAGAT   | GCAGCTTGATGATGAATGAGTG |
| dw3E2R1_SP8_FA  | CCATCTCATCCCTGCGTGTCTCCGACTCAG | CGTCTAGT   | GCAGCTTGATGATGAATGAGTG |
| dw3E2R1_SP9_FA  | CCATCTCATCCCTGCGTGTCTCCGACTCAG | TGTACTAC   | GCAGCTTGATGATGAATGAGTG |
| dw3E2R1_SP10_FA | CCATCTCATCCCTGCGTGTCTCCGACTCAG | CGTAGACT   | GCAGCTTGATGATGAATGAGTG |
| dw3E2R1_SP11_FA | CCATCTCATCCCTGCGTGTCTCCGACTCAG | TACGAGTA   | GCAGCTTGATGATGAATGAGTG |
| dw3E2R1_SP12_FA | CCATCTCATCCCTGCGTGTCTCCGACTCAG | TACTCTCG   | GCAGCTTGATGATGAATGAGTG |
| dw3E2R1_SP13_FA | CCATCTCATCCCTGCGTGTCTCCGACTCAG | TAGAGACG   | GCAGCTTGATGATGAATGAGTG |
| dw3E2R1_SP14_FA | CCATCTCATCCCTGCGTGTCTCCGACTCAG | ACTGTACA   | GCAGCTTGATGATGAATGAGTG |
| dw3E2R1_SP15_FA | CCATCTCATCCCTGCGTGTCTCCGACTCAG | ATAGAGTA   | GCAGCTTGATGATGAATGAGTG |
| dw3E2R1_SP16_FA | CCATCTCATCCCTGCGTGTCTCCGACTCAG | CACGCTAC   | GCAGCTTGATGATGAATGAGTG |
| dw3E2R1_SP17_FA | CCATCTCATCCCTGCGTGTCTCCGACTCAG | CAGTAGAC   | GCAGCTTGATGATGAATGAGTG |
| dw3E2R1_SP18_FA | CCATCTCATCCCTGCGTGTCTCCGACTCAG | CGACGTGA   | GCAGCTTGATGATGAATGAGTG |

|                 |                                |            |                        |
|-----------------|--------------------------------|------------|------------------------|
| dw3E2R1_SP19_FA | CCATCTCATCCCTGCGTGTCTCCGACTCAG | TCGATCAC   | GCAGCTTGATGATGAATGAGTG |
| dw3E2R1_SP20_FA | CCATCTCATCCCTGCGTGTCTCCGACTCAG | TCGCACTA   | GCAGCTTGATGATGAATGAGTG |
| dw3E2R1_SP21_FA | CCATCTCATCCCTGCGTGTCTCCGACTCAG | AGTCGAGA   | GCAGCTTGATGATGAATGAGTG |
| dw3E2R1_SP22_FA | CCATCTCATCCCTGCGTGTCTCCGACTCAG | CGCAGTAC   | GCAGCTTGATGATGAATGAGTG |
| dw3E2R1_SP23_FA | CCATCTCATCCCTGCGTGTCTCCGACTCAG | TATGCTAG   | GCAGCTTGATGATGAATGAGTG |
| dw3E1F6_FB      | CCTATCCCCTGTGTGCCTTGCCAGTCTCAG |            | GTTGACTTCGCCCTACCCGTC  |
| dw3E3F9_SP1_FA  | CCATCTCATCCCTGCGTGTCTCCGACTCAG | ACGAGTGCCT | TGAGCGCGGTCTGCAGCTGT   |
| dw3E3F9_SP2_FA  | CCATCTCATCCCTGCGTGTCTCCGACTCAG | AGACGCACTC | TGAGCGCGGTCTGCAGCTGT   |
| dw3E3F9_SP3_FA  | CCATCTCATCCCTGCGTGTCTCCGACTCAG | AGCACTGTAG | TGAGCGCGGTCTGCAGCTGT   |
| dw3E3F9_SP4_FA  | CCATCTCATCCCTGCGTGTCTCCGACTCAG | CTCGCGTGTC | TGAGCGCGGTCTGCAGCTGT   |
| dw3E3F9_SP5_FA  | CCATCTCATCCCTGCGTGTCTCCGACTCAG | TGATACGTCT | TGAGCGCGGTCTGCAGCTGT   |
| dw3E3F9_SP6_FA  | CCATCTCATCCCTGCGTGTCTCCGACTCAG | CATAGTAGTG | TGAGCGCGGTCTGCAGCTGT   |
| dw3E3F9_SP7_FA  | CCATCTCATCCCTGCGTGTCTCCGACTCAG | CGAGAGATAC | TGAGCGCGGTCTGCAGCTGT   |
| dw3E3F9_SP8_FA  | CCATCTCATCCCTGCGTGTCTCCGACTCAG | CGTCTAGTAC | TGAGCGCGGTCTGCAGCTGT   |
| dw3E3F9_SP9_FA  | CCATCTCATCCCTGCGTGTCTCCGACTCAG | TGTACTACTC | TGAGCGCGGTCTGCAGCTGT   |
| dw3E3F9_SP10_FA | CCATCTCATCCCTGCGTGTCTCCGACTCAG | CGTAGACTAG | TGAGCGCGGTCTGCAGCTGT   |
| dw3E3F9_SP11_FA | CCATCTCATCCCTGCGTGTCTCCGACTCAG | TACGAGTATG | TGAGCGCGGTCTGCAGCTGT   |
| dw3E3F9_SP12_FA | CCATCTCATCCCTGCGTGTCTCCGACTCAG | TACTCTCGTG | TGAGCGCGGTCTGCAGCTGT   |
| dw3E3F9_SP13_FA | CCATCTCATCCCTGCGTGTCTCCGACTCAG | TAGAGACGAG | TGAGCGCGGTCTGCAGCTGT   |
| dw3E3F9_SP14_FA | CCATCTCATCCCTGCGTGTCTCCGACTCAG | ACTGTACAGT | TGAGCGCGGTCTGCAGCTGT   |
| dw3E3F9_SP15_FA | CCATCTCATCCCTGCGTGTCTCCGACTCAG | ATAGAGTACT | TGAGCGCGGTCTGCAGCTGT   |
| dw3E3F9_SP16_FA | CCATCTCATCCCTGCGTGTCTCCGACTCAG | CACGCTACGT | TGAGCGCGGTCTGCAGCTGT   |
| dw3E3F9_SP17_FA | CCATCTCATCCCTGCGTGTCTCCGACTCAG | CAGTAGACGT | TGAGCGCGGTCTGCAGCTGT   |
| dw3E3F9_SP18_FA | CCATCTCATCCCTGCGTGTCTCCGACTCAG | CGACGTGACT | TGAGCGCGGTCTGCAGCTGT   |
| dw3E3F9_SP19_FA | CCATCTCATCCCTGCGTGTCTCCGACTCAG | TCGATCACGT | TGAGCGCGGTCTGCAGCTGT   |
| dw3E3F9_SP20_FA | CCATCTCATCCCTGCGTGTCTCCGACTCAG | TCGCACTAGT | TGAGCGCGGTCTGCAGCTGT   |
| dw3E3F9_SP21_FA | CCATCTCATCCCTGCGTGTCTCCGACTCAG | AGTCGAGAGA | TGAGCGCGGTCTGCAGCTGT   |
| dw3E3F9_SP22_FA | CCATCTCATCCCTGCGTGTCTCCGACTCAG | CGCAGTACGA | TGAGCGCGGTCTGCAGCTGT   |
| dw3E3F9_SP23_FA | CCATCTCATCCCTGCGTGTCTCCGACTCAG | TATGCTAGTA | TGAGCGCGGTCTGCAGCTGT   |
| dw3E3R1_FB      | CCTATCCCCTGTGTGCCTTGCCAGTCTCAG |            | CGTAGGAGGAGTTGCCGCTC   |
| dw3E3F10_SP1_FA | CCATCTCATCCCTGCGTGTCTCCGACTCAG | ACGAGTGC   | TCCGACTTCTCCAACGCCGACT |
| dw3E3F10_SP2_FA | CCATCTCATCCCTGCGTGTCTCCGACTCAG | AGACGCAC   | TCCGACTTCTCCAACGCCGACT |
| dw3E3F10_SP3_FA | CCATCTCATCCCTGCGTGTCTCCGACTCAG | AGCACTGT   | TCCGACTTCTCCAACGCCGACT |
| dw3E3F10_SP4_FA | CCATCTCATCCCTGCGTGTCTCCGACTCAG | CTCGCGTG   | TCCGACTTCTCCAACGCCGACT |
| dw3E3F10_SP5_FA | CCATCTCATCCCTGCGTGTCTCCGACTCAG | TGATACGT   | TCCGACTTCTCCAACGCCGACT |
| dw3E3F10_SP6_FA | CCATCTCATCCCTGCGTGTCTCCGACTCAG | CATAGTAG   | TCCGACTTCTCCAACGCCGACT |
| dw3E3F10_SP7_FA | CCATCTCATCCCTGCGTGTCTCCGACTCAG | CGAGAGAT   | TCCGACTTCTCCAACGCCGACT |
| dw3E3F10_SP8_FA | CCATCTCATCCCTGCGTGTCTCCGACTCAG | CGTCTAGT   | TCCGACTTCTCCAACGCCGACT |
| dw3E3F10_SP9_FA | CCATCTCATCCCTGCGTGTCTCCGACTCAG | TGTACTAC   | TCCGACTTCTCCAACGCCGACT |



|                  |                                |            |                        |
|------------------|--------------------------------|------------|------------------------|
| dw3E3F10_SP10_FA | CCATCTCATCCCTGCGTGTCTCCGACTCAG | CGTAGACT   | TCCGACTTCTCCAACGCCGACT |
| dw3E3F10_SP11_FA | CCATCTCATCCCTGCGTGTCTCCGACTCAG | TACGAGTA   | TCCGACTTCTCCAACGCCGACT |
| dw3E3F10_SP12_FA | CCATCTCATCCCTGCGTGTCTCCGACTCAG | TACTCTCG   | TCCGACTTCTCCAACGCCGACT |
| dw3E3F10_SP13_FA | CCATCTCATCCCTGCGTGTCTCCGACTCAG | TAGAGACG   | TCCGACTTCTCCAACGCCGACT |
| dw3E3F10_SP14_FA | CCATCTCATCCCTGCGTGTCTCCGACTCAG | ACTGTACA   | TCCGACTTCTCCAACGCCGACT |
| dw3E3F10_SP15_FA | CCATCTCATCCCTGCGTGTCTCCGACTCAG | ATAGAGTA   | TCCGACTTCTCCAACGCCGACT |
| dw3E3F10_SP16_FA | CCATCTCATCCCTGCGTGTCTCCGACTCAG | CACGCTAC   | TCCGACTTCTCCAACGCCGACT |
| dw3E3F10_SP17_FA | CCATCTCATCCCTGCGTGTCTCCGACTCAG | CAGTAGAC   | TCCGACTTCTCCAACGCCGACT |
| dw3E3F10_SP18_FA | CCATCTCATCCCTGCGTGTCTCCGACTCAG | CGACGTGA   | TCCGACTTCTCCAACGCCGACT |
| dw3E3F10_SP19_FA | CCATCTCATCCCTGCGTGTCTCCGACTCAG | TCGATCAC   | TCCGACTTCTCCAACGCCGACT |
| dw3E3F10_SP20_FA | CCATCTCATCCCTGCGTGTCTCCGACTCAG | TCGACTA    | TCCGACTTCTCCAACGCCGACT |
| dw3E3F10_SP21_FA | CCATCTCATCCCTGCGTGTCTCCGACTCAG | AGTCGAGA   | TCCGACTTCTCCAACGCCGACT |
| dw3E3F10_SP22_FA | CCATCTCATCCCTGCGTGTCTCCGACTCAG | CGCAGTAC   | TCCGACTTCTCCAACGCCGACT |
| dw3E3F10_SP23_FA | CCATCTCATCCCTGCGTGTCTCCGACTCAG | TATGCTAG   | TCCGACTTCTCCAACGCCGACT |
| dw3E3R10_FB      | CCTATCCCCTGTGTGCCTTGGCAGTCTCAG |            | GATGGCGGARCGCACGTTCT   |
| dw3E3F11_SP1_FA  | CCATCTCATCCCTGCGTGTCTCCGACTCAG | ACGAGTGCCT | GCATCTCGGTGATCGTGCAG   |
| dw3E3F11_SP2_FA  | CCATCTCATCCCTGCGTGTCTCCGACTCAG | AGACGACTC  | GCATCTCGGTGATCGTGCAG   |
| dw3E3F11_SP3_FA  | CCATCTCATCCCTGCGTGTCTCCGACTCAG | AGCACTGTAG | GCATCTCGGTGATCGTGCAG   |
| dw3E3F11_SP4_FA  | CCATCTCATCCCTGCGTGTCTCCGACTCAG | CTCGCGTGTC | GCATCTCGGTGATCGTGCAG   |
| dw3E3F11_SP5_FA  | CCATCTCATCCCTGCGTGTCTCCGACTCAG | TGATACGTCT | GCATCTCGGTGATCGTGCAG   |
| dw3E3F11_SP6_FA  | CCATCTCATCCCTGCGTGTCTCCGACTCAG | CATAGTAGTG | GCATCTCGGTGATCGTGCAG   |
| dw3E3F11_SP7_FA  | CCATCTCATCCCTGCGTGTCTCCGACTCAG | CGAGAGATAC | GCATCTCGGTGATCGTGCAG   |
| dw3E3F11_SP8_FA  | CCATCTCATCCCTGCGTGTCTCCGACTCAG | CGTCTAGTAC | GCATCTCGGTGATCGTGCAG   |
| dw3E3F11_SP9_FA  | CCATCTCATCCCTGCGTGTCTCCGACTCAG | TGTACTACTC | GCATCTCGGTGATCGTGCAG   |
| dw3E3F11_SP10_FA | CCATCTCATCCCTGCGTGTCTCCGACTCAG | CGTAGACTAG | GCATCTCGGTGATCGTGCAG   |
| dw3E3F11_SP11_FA | CCATCTCATCCCTGCGTGTCTCCGACTCAG | TACGAGTATG | GCATCTCGGTGATCGTGCAG   |
| dw3E3F11_SP12_FA | CCATCTCATCCCTGCGTGTCTCCGACTCAG | TACTCTCGTG | GCATCTCGGTGATCGTGCAG   |
| dw3E3F11_SP13_FA | CCATCTCATCCCTGCGTGTCTCCGACTCAG | TAGAGACGAG | GCATCTCGGTGATCGTGCAG   |
| dw3E3F11_SP14_FA | CCATCTCATCCCTGCGTGTCTCCGACTCAG | ACTGTACAGT | GCATCTCGGTGATCGTGCAG   |
| dw3E3F11_SP15_FA | CCATCTCATCCCTGCGTGTCTCCGACTCAG | ATAGAGTACT | GCATCTCGGTGATCGTGCAG   |
| dw3E3F11_SP16_FA | CCATCTCATCCCTGCGTGTCTCCGACTCAG | CACGCTACGT | GCATCTCGGTGATCGTGCAG   |
| dw3E3F11_SP17_FA | CCATCTCATCCCTGCGTGTCTCCGACTCAG | CAGTAGACGT | GCATCTCGGTGATCGTGCAG   |
| dw3E3F11_SP18_FA | CCATCTCATCCCTGCGTGTCTCCGACTCAG | CGACGTGACT | GCATCTCGGTGATCGTGCAG   |
| dw3E3F11_SP19_FA | CCATCTCATCCCTGCGTGTCTCCGACTCAG | TCGATCACGT | GCATCTCGGTGATCGTGCAG   |
| dw3E3F11_SP20_FA | CCATCTCATCCCTGCGTGTCTCCGACTCAG | TCGACTAGT  | GCATCTCGGTGATCGTGCAG   |
| dw3E3F11_SP21_FA | CCATCTCATCCCTGCGTGTCTCCGACTCAG | AGTCGAGAGA | GCATCTCGGTGATCGTGCAG   |
| dw3E3F11_SP22_FA | CCATCTCATCCCTGCGTGTCTCCGACTCAG | CGCAGTACGA | GCATCTCGGTGATCGTGCAG   |
| dw3E3F11_SP23_FA | CCATCTCATCCCTGCGTGTCTCCGACTCAG | TATGCTAGTA | GCATCTCGGTGATCGTGCAG   |
| dw3E3R11_FB      | CCTATCCCCTGTGTGCCTTGGCAGTCTCAG |            | GGAGACCATGAGCACCATGAAG |

**Table S3 Comparison of two *dw3* homoeologous genes**

|                                      | Identity |
|--------------------------------------|----------|
| Gene level                           | 0.916    |
| Coding region                        | 0.948    |
| Noncoding region                     | 0.667    |
| Protein level                        | 0.941    |
| dN (nonsynonymous substitution rate) | 0.033    |
| dS (synonymous substitution rate)    | 0.125    |

**Table S4 Summary of 454 reads**

| Region         | PCR length (bp) | Ave length of reads(bp) | Number of reads |
|----------------|-----------------|-------------------------|-----------------|
| dw3E1F1/R1     | 468             | 399                     | 31,309          |
| dw3E1F2/R2     | 416             | 354                     | 61,602          |
| dw3E1F3/R4     | 488             | 413                     | 37,817          |
| dw3E1F6/E2R1   | 471             | 347                     | 37,119          |
| dw3E3F9/E3R1   | 428             | 359                     | 41,259          |
| dw3E3F10/E3R11 | 513             | 371                     | 32,929          |
| dw3E3F11/E3R11 | 458             | 380                     | 34,237          |
| rhtF1/R1       | 521             | 398                     | 35,954          |
| others         |                 |                         | 14,910          |

**Table S5 Spectrum of mutations identified in the dwarfing candidate genes**

| Gene        | Freq <sup>a</sup> | Position | WT_Nu <sup>b</sup> | Mu_Nu <sup>c</sup> | WT_AA <sup>d</sup> | Mu_AA <sup>e</sup> | Function <sup>f</sup> | SIFT <sup>f</sup> | Superpool | EMS <sup>g</sup> | Validation <sup>h</sup> |
|-------------|-------------------|----------|--------------------|--------------------|--------------------|--------------------|-----------------------|-------------------|-----------|------------------|-------------------------|
| <i>dw3a</i> | 5                 | 89       | A                  | G                  | E                  | G                  | missense              | 0                 | sp2       | 1.5%             |                         |
| <i>dw3a</i> | 7                 | 104      | C                  | T                  | P                  | L                  | missense              | 0                 | sp19      | 1.5%             |                         |
| <i>dw3a</i> | 3                 | 200      | A                  | G                  | N                  | S                  | missense              | 0                 | sp11      | 1.5%             |                         |
| <i>dw3a</i> | 17                | 238      | A                  | G                  | S                  | G                  | missense              | 0.4               | sp6       | 1.0%             |                         |
| <i>dw3a</i> | 19                | 503      | C                  | T                  | A                  | V                  | missense              | 1                 | sp19      | 1.5%             | YES                     |
| <i>dw3a</i> | 11                | 582      | C                  | T                  | R                  | R                  | silent                | 1                 | sp14      | 1.5%             |                         |
| <i>dw3a</i> | 6                 | 628      | A                  | T                  | T                  | S                  | missense              | 0                 | sp9       | 1.0%             |                         |
| <i>dw3a</i> | 3                 | 677      | T                  | A                  | V                  | D                  | missense              | 0                 | sp17      | 1.5%             |                         |
| <i>dw3a</i> | 3                 | 730      | G                  | A                  | A                  | T                  | missense              | 0.2               | sp2       | 1.5%             |                         |
| <i>dw3a</i> | 10                | 742      | G                  | A                  | A                  | T                  | missense              | 0                 | sp19      | 1.5%             | YES                     |
| <i>dw3a</i> | 3                 | 838      | G                  | A                  | A                  | T                  | missense              | 0.2               | sp3       | 1.0%             |                         |
| <i>dw3a</i> | 6                 | 840      | G                  | A                  | A                  | A                  | silent                | 1                 | sp19      | 1.5%             |                         |
| <i>dw3a</i> | 9                 | 863      | G                  | A                  | R                  | Q                  | missense              | 0.1               | sp11      | 1.5%             |                         |
| <i>dw3a</i> | 3                 | 1023     | G                  | A                  | G                  | G                  | silent                | 1                 | sp17      | 1.5%             |                         |
| <i>dw3a</i> | 6                 | 1105     | C                  | T                  | R                  | C                  | missense              | 0.1               | sp14      | 1.5%             | YES                     |
| <i>dw3a</i> | 11                | 1124     | G                  | A                  | G                  | D                  | missense              | 0                 | sp7       | 1.0%             |                         |
| <i>dw3a</i> | 4                 | 1139     | C                  | T                  | T                  | I                  | missense              | 0.1               | sp7       | 1.0%             | YES                     |
| <i>dw3a</i> | 3                 | 1177     | C                  | T                  | Q                  | *                  | Stop codon            | 0                 | sp14      | 1.5%             | NO                      |
| <i>dw3a</i> | 9                 | 1185     | G                  | A                  | P                  | P                  | silent                | 1                 | sp9       | 1.0%             |                         |
| <i>dw3a</i> | 13                | 1189     | A                  | T                  | S                  | C                  | missense              | 0.2               | sp1       | 1.0%             |                         |
| <i>dw3a</i> | 5                 | 1200     | C                  | T                  | F                  | F                  | silent                | 1                 | sp14      | 1.5%             |                         |
| <i>dw3a</i> | 3                 | 1228     | A                  | G                  | K                  | E                  | missense              | 0                 | sp19      | 1.5%             |                         |
| <i>dw3a</i> | 4                 | 1270     | G                  | A                  | D                  | N                  | missense              | 0.5               | sp16      | 1.5%             |                         |
| <i>dw3a</i> | 3                 | 1294     | A                  | G                  | T                  | A                  | missense              | 0.8               | sp22      | 1.5%             |                         |
| <i>dw3a</i> | 8                 | 1295     | C                  | T                  | T                  | M                  | missense              | 0.1               | sp14      | 1.5%             |                         |
| <i>dw3a</i> | 5                 | 1315     | G                  | A                  | G                  | S                  | missense              | 0.1               | sp22      | 1.5%             |                         |
| <i>dw3a</i> | 10                | 1526     | T                  | A                  | L                  | H                  | missense              | 0                 | sp17      | 1.5%             |                         |
| <i>dw3a</i> | 5                 | 1564     | C                  | T                  | L                  | L                  | silent                | 1                 | sp21      | 1.5%             |                         |
| <i>dw3a</i> | 9                 | 1594     | C                  | T                  | L                  | L                  | silent                | 1                 | sp21      | 1.5%             |                         |
| <i>dw3a</i> | 4                 | 1606     | G                  | A                  | D                  | N                  | missense              | 0.2               | sp15      | 1.5%             |                         |
| <i>dw3a</i> | 7                 | 1642     | G                  | A                  | A                  | T                  | missense              | 0                 | sp23      | 1.5%             |                         |
| <i>dw3a</i> | 8                 | 1811     | G                  | A                  | S                  | N                  | missense              | 0                 | sp9       | 1.0%             |                         |
| <i>dw3a</i> | 3                 | 1814     | C                  | A                  | A                  | E                  | missense              | 0                 | sp15      | 1.5%             |                         |
| <i>dw3a</i> | 11                | 1840     | G                  | A                  | V                  | M                  | missense              | 0                 | sp16      | 1.5%             |                         |
| <i>dw3a</i> | 3                 | 1849     | G                  | A                  | A                  | T                  | missense              | 0                 | sp2       | 1.5%             |                         |
| <i>dw3a</i> | 3                 | 1960     | A                  | T                  | I                  | F                  | missense              | 0.6               | sp7       | 1.0%             |                         |
| <i>dw3a</i> | 4                 | 1964     | G                  | A                  | G                  | E                  | missense              | 0                 | sp23      | 1.5%             |                         |

|             |    |      |   |   |   |   |            |     |      |      |     |
|-------------|----|------|---|---|---|---|------------|-----|------|------|-----|
| <i>dw3a</i> | 3  | 1999 | G | A | G | S | missense   | 0.1 | sp5  | 1.0% |     |
| <i>dw3a</i> | 3  | 2288 | G | A | R | K | missense   | 0.2 | sp17 | 1.5% |     |
| <i>dw3a</i> | 3  | 2451 | G | A | Y | Y | silent     | 1   | sp12 | 1.0% |     |
| <i>dw3a</i> | 6  | 2593 | G | A | A | T | missense   | 0   | sp14 | 1.5% |     |
| <i>dw3a</i> | 5  | 2855 | C | T | A | V | missense   | 0   | sp14 | 1.5% |     |
| <i>dw3a</i> | 3  | 2863 | C | T | R | C | missense   | 0   | sp6  | 1.0% |     |
| <i>dw3a</i> | 5  | 2867 | C | T | A | V | missense   | 0   | sp23 | 1.5% |     |
| <i>dw3a</i> | 3  | 2922 | C | A | A | A | silent     | 1   | sp10 | 1.0% |     |
| <i>dw3b</i> | 14 | 48   | C | T | G | G | silent     | 1   | sp18 | 1.5% |     |
| <i>dw3b</i> | 4  | 76   | C | T | P | S | missense   | 0   | sp18 | 1.5% |     |
| <i>dw3b</i> | 6  | 95   | A | T | H | L | missense   | 0   | sp15 | 1.5% |     |
| <i>dw3b</i> | 4  | 106  | C | T | P | S | missense   | 0   | sp20 | 1.5% | YES |
| <i>dw3b</i> | 3  | 118  | C | T | Q | * | Stop codon | 0   | sp19 | 1.5% | NO  |
| <i>dw3b</i> | 6  | 127  | G | A | G | R | missense   | 0.2 | sp21 | 1.5% |     |
| <i>dw3b</i> | 6  | 230  | C | T | S | F | missense   | 0.1 | sp18 | 1.5% |     |
| <i>dw3b</i> | 4  | 266  | A | G | Q | R | missense   | 0   | sp9  | 1.0% |     |
| <i>dw3b</i> | 9  | 377  | C | T | A | V | missense   | 0   | sp11 | 1.5% |     |
| <i>dw3b</i> | 4  | 427  | C | T | L | F | missense   | 0   | sp7  | 1.0% | NO  |
| <i>dw3b</i> | 3  | 478  | C | T | L | L | silent     | 1   | sp11 | 1.5% |     |
| <i>dw3b</i> | 3  | 495  | G | A | L | L | silent     | 1   | sp2  | 1.5% |     |
| <i>dw3b</i> | 3  | 499  | T | G | Y | D | missense   | 0.9 | sp2  | 1.5% |     |
| <i>dw3b</i> | 11 | 513  | G | A | G | G | silent     | 1   | sp19 | 1.5% |     |
| <i>dw3b</i> | 4  | 517  | G | A | A | T | missense   | 0.1 | sp20 | 1.5% | NO  |
| <i>dw3b</i> | 3  | 530  | C | T | A | V | missense   | 1   | sp16 | 1.5% |     |
| <i>dw3b</i> | 4  | 642  | C | T | T | T | silent     | 1   | sp16 | 1.5% |     |
| <i>dw3b</i> | 19 | 689  | C | T | A | V | missense   | 0.1 | sp20 | 1.5% |     |
| <i>dw3b</i> | 8  | 746  | C | T | A | V | missense   | 0.2 | sp22 | 1.5% |     |
| <i>dw3b</i> | 4  | 764  | T | A | F | Y | missense   | 0.1 | sp21 | 1.5% |     |
| <i>dw3b</i> | 5  | 813  | C | T | V | V | silent     | 1   | sp14 | 1.5% |     |
| <i>dw3b</i> | 4  | 829  | G | A | A | T | missense   | 0   | sp22 | 1.5% |     |
| <i>dw3b</i> | 3  | 843  | C | T | L | L | silent     | 1   | sp10 | 1.0% |     |
| <i>dw3b</i> | 8  | 850  | G | A | A | T | missense   | 0.3 | sp19 | 1.5% |     |
| <i>dw3b</i> | 10 | 855  | G | A | A | A | silent     | 1   | sp19 | 1.5% |     |
| <i>dw3b</i> | 8  | 920  | A | T | Q | L | missense   | 0   | sp23 | 1.5% |     |
| <i>dw3b</i> | 6  | 929  | C | T | A | V | missense   | 0.1 | sp1  | 1.0% |     |
| <i>dw3b</i> | 5  | 1041 | C | T | L | L | silent     | 1   | sp18 | 1.5% |     |
| <i>dw3b</i> | 4  | 1051 | G | A | G | S | missense   | 0   | sp21 | 1.5% |     |
| <i>dw3b</i> | 3  | 1143 | C | T | A | A | silent     | 1   | sp13 | 1.5% |     |
| <i>dw3b</i> | 3  | 1146 | C | T | I | I | silent     | 1   | sp20 | 1.5% |     |

|              |    |      |   |   |   |   |            |     |      |      |     |
|--------------|----|------|---|---|---|---|------------|-----|------|------|-----|
| <i>dw3b</i>  | 3  | 1163 | C | T | S | F | missense   | 0   | sp14 | 1.5% |     |
| <i>dw3b</i>  | 6  | 1273 | C | T | L | F | missense   | 0.1 | sp20 | 1.5% |     |
| <i>dw3b</i>  | 3  | 1318 | G | A | V | M | missense   | 0   | sp10 | 1.0% |     |
| <i>dw3b</i>  | 3  | 1322 | C | T | T | M | missense   | 0.1 | sp17 | 1.5% |     |
| <i>dw3b</i>  | 3  | 1354 | G | A | A | T | missense   | 0.2 | sp21 | 1.5% |     |
| <i>dw3b</i>  | 7  | 1460 | C | T | T | M | missense   | 0   | sp19 | 1.5% |     |
| <i>dw3b</i>  | 11 | 1481 | G | A | R | K | missense   | 0   | sp17 | 1.5% |     |
| <i>dw3b</i>  | 3  | 1604 | G | A | S | N | missense   | 0   | sp8  | 1.0% |     |
| <i>dw3b</i>  | 4  | 1621 | C | T | L | L | silent     | 1   | sp2  | 1.5% |     |
| <i>dw3b</i>  | 6  | 1683 | C | T | N | N | silent     | 1   | sp14 | 1.5% |     |
| <i>dw3b</i>  | 6  | 1738 | G | T | E | * | Stop codon | 0   | sp14 | 1.5% |     |
| <i>dw3b</i>  | 5  | 1739 | A | G | E | G | missense   | 0   | sp14 | 1.5% |     |
| <i>dw3b</i>  | 4  | 1760 | G | A | G | D | missense   | 0   | sp18 | 1.5% |     |
| <i>dw3b</i>  | 5  | 1831 | G | A | A | T | missense   | 0   | sp18 | 1.5% |     |
| <i>dw3b</i>  | 5  | 1841 | C | T | A | V | missense   | 0   | sp11 | 1.5% |     |
| <i>dw3b</i>  | 8  | 1867 | G | A | V | M | missense   | 0   | sp2  | 1.5% |     |
| <i>dw3b</i>  | 3  | 1884 | C | T | R | R | silent     | 1   | sp16 | 1.5% |     |
| <i>dw3b</i>  | 5  | 1899 | G | A | R | R | silent     | 1   | sp11 | 1.5% |     |
| <i>dw3b</i>  | 3  | 1941 | C | T | K | K | silent     | 1   | sp6  | 1.0% |     |
| <i>dw3b</i>  | 6  | 1984 | G | A | E | K | missense   | 0   | sp18 | 1.5% |     |
| <i>dw3b</i>  | 3  | 2077 | G | A | A | T | missense   | 0.7 | sp19 | 1.5% |     |
| <i>dw3b</i>  | 3  | 2210 | T | C | F | S | missense   | 0.3 | sp3  | 1.0% |     |
| <i>dw3b</i>  | 14 | 2238 | G | A | E | E | silent     | 1   | sp19 | 1.5% |     |
| <i>dw3b</i>  | 10 | 2257 | A | T | M | L | missense   | 0.7 | sp2  | 1.5% |     |
| <i>dw3b</i>  | 3  | 2284 | G | A | A | T | missense   | 0.6 | sp17 | 1.5% |     |
| <i>dw3b</i>  | 5  | 2287 | G | A | G | R | missense   | 0.6 | sp3  | 1.0% |     |
| <i>dw3b</i>  | 11 | 2289 | G | A | A | A | silent     | 1   | sp15 | 1.5% |     |
| <i>dw3b</i>  | 3  | 2387 | C | G | A | G | missense   | 0   | sp1  | 1.0% |     |
| <i>dw3b</i>  | 7  | 2440 | C | T | P | S | missense   | 0.5 | sp5  | 1.0% |     |
| <i>dw3b</i>  | 5  | 2772 | G | A | R | R | silent     | 1   | sp14 | 1.5% |     |
| <i>dw3b</i>  | 10 | 2784 | G | A | V | V | silent     | 1   | sp18 | 1.5% |     |
| <i>dw3b</i>  | 3  | 2797 | G | A | V | M | missense   | 0   | sp4  | 1.0% |     |
| <i>dw3b</i>  | 5  | 2803 | C | T | P | S | missense   | 0   | sp23 | 1.5% |     |
| <i>dw3b</i>  | 3  | 2892 | G | A | I | I | silent     | 1   | sp16 | 1.5% |     |
| <i>dw3b</i>  | 8  | 2925 | C | T | V | V | silent     | 1   | sp20 | 1.5% |     |
| <i>dw3b</i>  | 5  | 3035 | G | A | G | E | missense   | 0   | sp20 | 1.5% |     |
| <i>dw3b</i>  | 3  | 3059 | C | T | A | V | missense   | 0   | sp6  | 1.0% |     |
| <i>dw3b</i>  | 4  | 3133 | C | T | R | C | missense   | 0   | sp21 | 1.5% |     |
| <i>rht1a</i> | 4  | 358  | C | T | P | S | missense   | 0   | sp18 | 1.5% | YES |

|              |   |     |   |   |   |   |            |     |      |      |
|--------------|---|-----|---|---|---|---|------------|-----|------|------|
| <i>rht1a</i> | 3 | 408 | C | T | G | G | silent     | 1   | sp2  | 1.5% |
| <i>rht1b</i> | 5 | 108 | G | A | V | V | silent     | 1   | sp21 | 1.5% |
| <i>rht1b</i> | 3 | 160 | G | A | A | T | missense   | 0.1 | sp13 | 1.5% |
| <i>rht1b</i> | 3 | 184 | C | T | Q | * | Stop codon | 0   | sp23 | 1.5% |
| <i>rht1b</i> | 4 | 219 | C | A | A | A | silent     | 1   | sp5  | 1.0% |

<sup>a</sup> The mutation frequency in the total dataset

<sup>b</sup> The wild type nucleotide

<sup>c</sup> The mutated nucleotide

<sup>d</sup> The wild type amino acid

<sup>e</sup> The mutated amino acid

<sup>f</sup> Function and SIFT represent predicted protein function effect and the scores, respectively. A score value < 0.05 is usually predicted as damaging effect

<sup>g</sup> The EMS concentration used to treat the seeds

<sup>h</sup> PCR validation of selected mutations. YES indicates that a mutation was validated by Sanger sequencing. NO indicates that a mutation was found to be a false positive by Sanger sequencing

**Table S6 Comparison of expected and observed types of mutations**

|            | <i>dw3</i> |          | <i>rht1</i> |          |
|------------|------------|----------|-------------|----------|
|            | Expected   | Observed | Expected    | Observed |
| Missense   | 50.36%     | 70.18%   | 57.14%      | 50.00%   |
| Silent     | 46.59%     | 27.19%   | 41.35%      | 50.00%   |
| Stop codon | 3.05%      | 2.63%    | 1.50%       |          |
