# Supplementary material
Source: PubMed Central journal article supplement (PMC3522160)
Supplement: 68139b4a02242fea60e23403e8cd0bf5_genetics.112.144436-4.pdf [file 68139b4a02242fea60e23403e8cd0bf5_genetics.112.144436-4.pdf]

**Table S4 Summary of 454 reads**

| Region         | PCR length (bp) | Ave length of reads(bp) | Number of reads |
|----------------|-----------------|-------------------------|-----------------|
| dw3E1F1/R1     | 468             | 399                     | 31,309          |
| dw3E1F2/R2     | 416             | 354                     | 61,602          |
| dw3E1F3/R4     | 488             | 413                     | 37,817          |
| dw3E1F6/E2R1   | 471             | 347                     | 37,119          |
| dw3E3F9/E3R1   | 428             | 359                     | 41,259          |
| dw3E3F10/E3R11 | 513             | 371                     | 32,929          |
| dw3E3F11/E3R11 | 458             | 380                     | 34,237          |
| rhtF1/R1       | 521             | 398                     | 35,954          |
| others         |                 |                         | 14,910          |
