# Supplementary material
Source: PubMed Central journal article supplement (PMC3522160)
Supplement: 84708dda672546b8c47f61660ffa58ea_genetics.112.144436-10.pdf [file 84708dda672546b8c47f61660ffa58ea_genetics.112.144436-10.pdf]

**Table S5 Spectrum of mutations identified in the dwarfing candidate genes**

| Gene        | Freq <sup>a</sup> | Position | WT_Nu <sup>b</sup> | Mu_Nu <sup>c</sup> | WT_AA <sup>d</sup> | Mu_AA <sup>e</sup> | Function <sup>f</sup> | SIFT <sup>f</sup> | Superpool | EMS <sup>g</sup> | Validation <sup>h</sup> |
|-------------|-------------------|----------|--------------------|--------------------|--------------------|--------------------|-----------------------|-------------------|-----------|------------------|-------------------------|
| <i>dw3a</i> | 5                 | 89       | A                  | G                  | E                  | G                  | missense              | 0                 | sp2       | 1.5%             |                         |
| <i>dw3a</i> | 7                 | 104      | C                  | T                  | P                  | L                  | missense              | 0                 | sp19      | 1.5%             |                         |
| <i>dw3a</i> | 3                 | 200      | A                  | G                  | N                  | S                  | missense              | 0                 | sp11      | 1.5%             |                         |
| <i>dw3a</i> | 17                | 238      | A                  | G                  | S                  | G                  | missense              | 0.4               | sp6       | 1.0%             |                         |
| <i>dw3a</i> | 19                | 503      | C                  | T                  | A                  | V                  | missense              | 1                 | sp19      | 1.5%             | YES                     |
| <i>dw3a</i> | 11                | 582      | C                  | T                  | R                  | R                  | silent                | 1                 | sp14      | 1.5%             |                         |
| <i>dw3a</i> | 6                 | 628      | A                  | T                  | T                  | S                  | missense              | 0                 | sp9       | 1.0%             |                         |
| <i>dw3a</i> | 3                 | 677      | T                  | A                  | V                  | D                  | missense              | 0                 | sp17      | 1.5%             |                         |
| <i>dw3a</i> | 3                 | 730      | G                  | A                  | A                  | T                  | missense              | 0.2               | sp2       | 1.5%             |                         |
| <i>dw3a</i> | 10                | 742      | G                  | A                  | A                  | T                  | missense              | 0                 | sp19      | 1.5%             | YES                     |
| <i>dw3a</i> | 3                 | 838      | G                  | A                  | A                  | T                  | missense              | 0.2               | sp3       | 1.0%             |                         |
| <i>dw3a</i> | 6                 | 840      | G                  | A                  | A                  | A                  | silent                | 1                 | sp19      | 1.5%             |                         |
| <i>dw3a</i> | 9                 | 863      | G                  | A                  | R                  | Q                  | missense              | 0.1               | sp11      | 1.5%             |                         |
| <i>dw3a</i> | 3                 | 1023     | G                  | A                  | G                  | G                  | silent                | 1                 | sp17      | 1.5%             |                         |
| <i>dw3a</i> | 6                 | 1105     | C                  | T                  | R                  | C                  | missense              | 0.1               | sp14      | 1.5%             | YES                     |
| <i>dw3a</i> | 11                | 1124     | G                  | A                  | G                  | D                  | missense              | 0                 | sp7       | 1.0%             |                         |
| <i>dw3a</i> | 4                 | 1139     | C                  | T                  | T                  | I                  | missense              | 0.1               | sp7       | 1.0%             | YES                     |
| <i>dw3a</i> | 3                 | 1177     | C                  | T                  | Q                  | *                  | Stop codon            | 0                 | sp14      | 1.5%             | NO                      |
| <i>dw3a</i> | 9                 | 1185     | G                  | A                  | P                  | P                  | silent                | 1                 | sp9       | 1.0%             |                         |
| <i>dw3a</i> | 13                | 1189     | A                  | T                  | S                  | C                  | missense              | 0.2               | sp1       | 1.0%             |                         |
| <i>dw3a</i> | 5                 | 1200     | C                  | T                  | F                  | F                  | silent                | 1                 | sp14      | 1.5%             |                         |
| <i>dw3a</i> | 3                 | 1228     | A                  | G                  | K                  | E                  | missense              | 0                 | sp19      | 1.5%             |                         |
| <i>dw3a</i> | 4                 | 1270     | G                  | A                  | D                  | N                  | missense              | 0.5               | sp16      | 1.5%             |                         |
| <i>dw3a</i> | 3                 | 1294     | A                  | G                  | T                  | A                  | missense              | 0.8               | sp22      | 1.5%             |                         |
| <i>dw3a</i> | 8                 | 1295     | C                  | T                  | T                  | M                  | missense              | 0.1               | sp14      | 1.5%             |                         |
| <i>dw3a</i> | 5                 | 1315     | G                  | A                  | G                  | S                  | missense              | 0.1               | sp22      | 1.5%             |                         |
| <i>dw3a</i> | 10                | 1526     | T                  | A                  | L                  | H                  | missense              | 0                 | sp17      | 1.5%             |                         |
| <i>dw3a</i> | 5                 | 1564     | C                  | T                  | L                  | L                  | silent                | 1                 | sp21      | 1.5%             |                         |
| <i>dw3a</i> | 9                 | 1594     | C                  | T                  | L                  | L                  | silent                | 1                 | sp21      | 1.5%             |                         |
| <i>dw3a</i> | 4                 | 1606     | G                  | A                  | D                  | N                  | missense              | 0.2               | sp15      | 1.5%             |                         |
| <i>dw3a</i> | 7                 | 1642     | G                  | A                  | A                  | T                  | missense              | 0                 | sp23      | 1.5%             |                         |
| <i>dw3a</i> | 8                 | 1811     | G                  | A                  | S                  | N                  | missense              | 0                 | sp9       | 1.0%             |                         |
| <i>dw3a</i> | 3                 | 1814     | C                  | A                  | A                  | E                  | missense              | 0                 | sp15      | 1.5%             |                         |
| <i>dw3a</i> | 11                | 1840     | G                  | A                  | V                  | M                  | missense              | 0                 | sp16      | 1.5%             |                         |
| <i>dw3a</i> | 3                 | 1849     | G                  | A                  | A                  | T                  | missense              | 0                 | sp2       | 1.5%             |                         |
| <i>dw3a</i> | 3                 | 1960     | A                  | T                  | I                  | F                  | missense              | 0.6               | sp7       | 1.0%             |                         |
| <i>dw3a</i> | 4                 | 1964     | G                  | A                  | G                  | E                  | missense              | 0                 | sp23      | 1.5%             |                         |

|             |    |      |   |   |   |   |            |     |      |      |     |
|-------------|----|------|---|---|---|---|------------|-----|------|------|-----|
| <i>dw3a</i> | 3  | 1999 | G | A | G | S | missense   | 0.1 | sp5  | 1.0% |     |
| <i>dw3a</i> | 3  | 2288 | G | A | R | K | missense   | 0.2 | sp17 | 1.5% |     |
| <i>dw3a</i> | 3  | 2451 | G | A | Y | Y | silent     | 1   | sp12 | 1.0% |     |
| <i>dw3a</i> | 6  | 2593 | G | A | A | T | missense   | 0   | sp14 | 1.5% |     |
| <i>dw3a</i> | 5  | 2855 | C | T | A | V | missense   | 0   | sp14 | 1.5% |     |
| <i>dw3a</i> | 3  | 2863 | C | T | R | C | missense   | 0   | sp6  | 1.0% |     |
| <i>dw3a</i> | 5  | 2867 | C | T | A | V | missense   | 0   | sp23 | 1.5% |     |
| <i>dw3a</i> | 3  | 2922 | C | A | A | A | silent     | 1   | sp10 | 1.0% |     |
| <i>dw3b</i> | 14 | 48   | C | T | G | G | silent     | 1   | sp18 | 1.5% |     |
| <i>dw3b</i> | 4  | 76   | C | T | P | S | missense   | 0   | sp18 | 1.5% |     |
| <i>dw3b</i> | 6  | 95   | A | T | H | L | missense   | 0   | sp15 | 1.5% |     |
| <i>dw3b</i> | 4  | 106  | C | T | P | S | missense   | 0   | sp20 | 1.5% | YES |
| <i>dw3b</i> | 3  | 118  | C | T | Q | * | Stop codon | 0   | sp19 | 1.5% | NO  |
| <i>dw3b</i> | 6  | 127  | G | A | G | R | missense   | 0.2 | sp21 | 1.5% |     |
| <i>dw3b</i> | 6  | 230  | C | T | S | F | missense   | 0.1 | sp18 | 1.5% |     |
| <i>dw3b</i> | 4  | 266  | A | G | Q | R | missense   | 0   | sp9  | 1.0% |     |
| <i>dw3b</i> | 9  | 377  | C | T | A | V | missense   | 0   | sp11 | 1.5% |     |
| <i>dw3b</i> | 4  | 427  | C | T | L | F | missense   | 0   | sp7  | 1.0% | NO  |
| <i>dw3b</i> | 3  | 478  | C | T | L | L | silent     | 1   | sp11 | 1.5% |     |
| <i>dw3b</i> | 3  | 495  | G | A | L | L | silent     | 1   | sp2  | 1.5% |     |
| <i>dw3b</i> | 3  | 499  | T | G | Y | D | missense   | 0.9 | sp2  | 1.5% |     |
| <i>dw3b</i> | 11 | 513  | G | A | G | G | silent     | 1   | sp19 | 1.5% |     |
| <i>dw3b</i> | 4  | 517  | G | A | A | T | missense   | 0.1 | sp20 | 1.5% | NO  |
| <i>dw3b</i> | 3  | 530  | C | T | A | V | missense   | 1   | sp16 | 1.5% |     |
| <i>dw3b</i> | 4  | 642  | C | T | T | T | silent     | 1   | sp16 | 1.5% |     |
| <i>dw3b</i> | 19 | 689  | C | T | A | V | missense   | 0.1 | sp20 | 1.5% |     |
| <i>dw3b</i> | 8  | 746  | C | T | A | V | missense   | 0.2 | sp22 | 1.5% |     |
| <i>dw3b</i> | 4  | 764  | T | A | F | Y | missense   | 0.1 | sp21 | 1.5% |     |
| <i>dw3b</i> | 5  | 813  | C | T | V | V | silent     | 1   | sp14 | 1.5% |     |
| <i>dw3b</i> | 4  | 829  | G | A | A | T | missense   | 0   | sp22 | 1.5% |     |
| <i>dw3b</i> | 3  | 843  | C | T | L | L | silent     | 1   | sp10 | 1.0% |     |
| <i>dw3b</i> | 8  | 850  | G | A | A | T | missense   | 0.3 | sp19 | 1.5% |     |
| <i>dw3b</i> | 10 | 855  | G | A | A | A | silent     | 1   | sp19 | 1.5% |     |
| <i>dw3b</i> | 8  | 920  | A | T | Q | L | missense   | 0   | sp23 | 1.5% |     |
| <i>dw3b</i> | 6  | 929  | C | T | A | V | missense   | 0.1 | sp1  | 1.0% |     |
| <i>dw3b</i> | 5  | 1041 | C | T | L | L | silent     | 1   | sp18 | 1.5% |     |
| <i>dw3b</i> | 4  | 1051 | G | A | G | S | missense   | 0   | sp21 | 1.5% |     |
| <i>dw3b</i> | 3  | 1143 | C | T | A | A | silent     | 1   | sp13 | 1.5% |     |
| <i>dw3b</i> | 3  | 1146 | C | T | I | I | silent     | 1   | sp20 | 1.5% |     |

|              |    |      |   |   |   |   |            |     |      |      |     |
|--------------|----|------|---|---|---|---|------------|-----|------|------|-----|
| <i>dw3b</i>  | 3  | 1163 | C | T | S | F | missense   | 0   | sp14 | 1.5% |     |
| <i>dw3b</i>  | 6  | 1273 | C | T | L | F | missense   | 0.1 | sp20 | 1.5% |     |
| <i>dw3b</i>  | 3  | 1318 | G | A | V | M | missense   | 0   | sp10 | 1.0% |     |
| <i>dw3b</i>  | 3  | 1322 | C | T | T | M | missense   | 0.1 | sp17 | 1.5% |     |
| <i>dw3b</i>  | 3  | 1354 | G | A | A | T | missense   | 0.2 | sp21 | 1.5% |     |
| <i>dw3b</i>  | 7  | 1460 | C | T | T | M | missense   | 0   | sp19 | 1.5% |     |
| <i>dw3b</i>  | 11 | 1481 | G | A | R | K | missense   | 0   | sp17 | 1.5% |     |
| <i>dw3b</i>  | 3  | 1604 | G | A | S | N | missense   | 0   | sp8  | 1.0% |     |
| <i>dw3b</i>  | 4  | 1621 | C | T | L | L | silent     | 1   | sp2  | 1.5% |     |
| <i>dw3b</i>  | 6  | 1683 | C | T | N | N | silent     | 1   | sp14 | 1.5% |     |
| <i>dw3b</i>  | 6  | 1738 | G | T | E | * | Stop codon | 0   | sp14 | 1.5% |     |
| <i>dw3b</i>  | 5  | 1739 | A | G | E | G | missense   | 0   | sp14 | 1.5% |     |
| <i>dw3b</i>  | 4  | 1760 | G | A | G | D | missense   | 0   | sp18 | 1.5% |     |
| <i>dw3b</i>  | 5  | 1831 | G | A | A | T | missense   | 0   | sp18 | 1.5% |     |
| <i>dw3b</i>  | 5  | 1841 | C | T | A | V | missense   | 0   | sp11 | 1.5% |     |
| <i>dw3b</i>  | 8  | 1867 | G | A | V | M | missense   | 0   | sp2  | 1.5% |     |
| <i>dw3b</i>  | 3  | 1884 | C | T | R | R | silent     | 1   | sp16 | 1.5% |     |
| <i>dw3b</i>  | 5  | 1899 | G | A | R | R | silent     | 1   | sp11 | 1.5% |     |
| <i>dw3b</i>  | 3  | 1941 | C | T | K | K | silent     | 1   | sp6  | 1.0% |     |
| <i>dw3b</i>  | 6  | 1984 | G | A | E | K | missense   | 0   | sp18 | 1.5% |     |
| <i>dw3b</i>  | 3  | 2077 | G | A | A | T | missense   | 0.7 | sp19 | 1.5% |     |
| <i>dw3b</i>  | 3  | 2210 | T | C | F | S | missense   | 0.3 | sp3  | 1.0% |     |
| <i>dw3b</i>  | 14 | 2238 | G | A | E | E | silent     | 1   | sp19 | 1.5% |     |
| <i>dw3b</i>  | 10 | 2257 | A | T | M | L | missense   | 0.7 | sp2  | 1.5% |     |
| <i>dw3b</i>  | 3  | 2284 | G | A | A | T | missense   | 0.6 | sp17 | 1.5% |     |
| <i>dw3b</i>  | 5  | 2287 | G | A | G | R | missense   | 0.6 | sp3  | 1.0% |     |
| <i>dw3b</i>  | 11 | 2289 | G | A | A | A | silent     | 1   | sp15 | 1.5% |     |
| <i>dw3b</i>  | 3  | 2387 | C | G | A | G | missense   | 0   | sp1  | 1.0% |     |
| <i>dw3b</i>  | 7  | 2440 | C | T | P | S | missense   | 0.5 | sp5  | 1.0% |     |
| <i>dw3b</i>  | 5  | 2772 | G | A | R | R | silent     | 1   | sp14 | 1.5% |     |
| <i>dw3b</i>  | 10 | 2784 | G | A | V | V | silent     | 1   | sp18 | 1.5% |     |
| <i>dw3b</i>  | 3  | 2797 | G | A | V | M | missense   | 0   | sp4  | 1.0% |     |
| <i>dw3b</i>  | 5  | 2803 | C | T | P | S | missense   | 0   | sp23 | 1.5% |     |
| <i>dw3b</i>  | 3  | 2892 | G | A | I | I | silent     | 1   | sp16 | 1.5% |     |
| <i>dw3b</i>  | 8  | 2925 | C | T | V | V | silent     | 1   | sp20 | 1.5% |     |
| <i>dw3b</i>  | 5  | 3035 | G | A | G | E | missense   | 0   | sp20 | 1.5% |     |
| <i>dw3b</i>  | 3  | 3059 | C | T | A | V | missense   | 0   | sp6  | 1.0% |     |
| <i>dw3b</i>  | 4  | 3133 | C | T | R | C | missense   | 0   | sp21 | 1.5% |     |
| <i>rht1a</i> | 4  | 358  | C | T | P | S | missense   | 0   | sp18 | 1.5% | YES |

|              |   |     |   |   |   |   |            |     |      |      |
|--------------|---|-----|---|---|---|---|------------|-----|------|------|
| <i>rht1a</i> | 3 | 408 | C | T | G | G | silent     | 1   | sp2  | 1.5% |
| <i>rht1b</i> | 5 | 108 | G | A | V | V | silent     | 1   | sp21 | 1.5% |
| <i>rht1b</i> | 3 | 160 | G | A | A | T | missense   | 0.1 | sp13 | 1.5% |
| <i>rht1b</i> | 3 | 184 | C | T | Q | * | Stop codon | 0   | sp23 | 1.5% |
| <i>rht1b</i> | 4 | 219 | C | A | A | A | silent     | 1   | sp5  | 1.0% |

<sup>a</sup> The mutation frequency in the total dataset

<sup>b</sup> The wild type nucleotide

<sup>c</sup> The mutated nucleotide

<sup>d</sup> The wild type amino acid

<sup>e</sup> The mutated amino acid

<sup>f</sup> Function and SIFT represent predicted protein function effect and the scores, respectively. A score value < 0.05 is usually predicted as damaging effect

<sup>g</sup> The EMS concentration used to treat the seeds

<sup>h</sup> PCR validation of selected mutations. YES indicates that a mutation was validated by Sanger sequencing. NO indicates that a mutation was found to be a false positive by Sanger sequencing
