# Supplementary material
Source: PubMed Central journal article supplement (PMC3522160)
Supplement: 402397656afdbf30b3d10f86e18d8915_genetics.112.144436-6.pdf [file 402397656afdbf30b3d10f86e18d8915_genetics.112.144436-6.pdf]

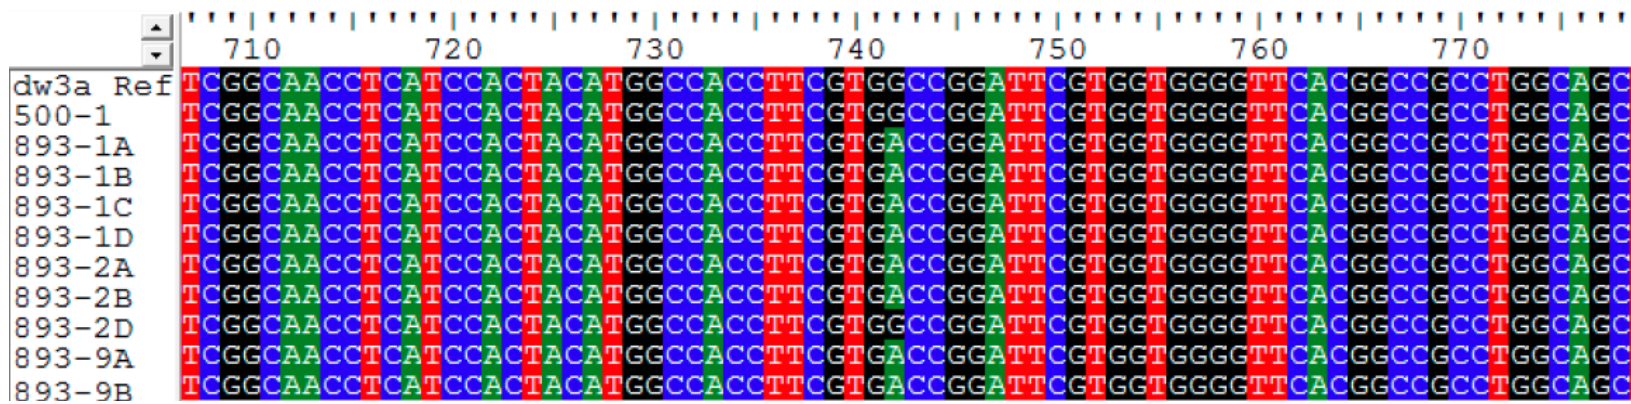

A)

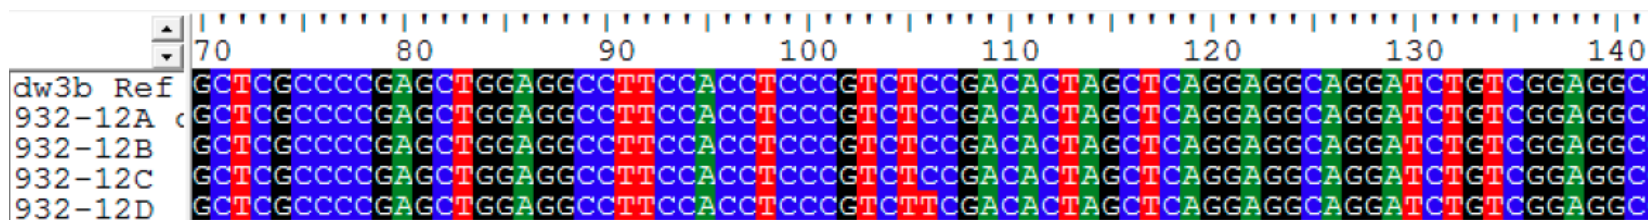

B)

**Figure S2** Sanger sequencing validation on M3 generation plants segregating for mutations in a candidate *tef* dwarfing gene. A) p893 mutant alignment with reference sequence of *dw3a* gene. The G742A mutation is validated by seven p893 M3 lines; B) p932 mutant alignment with reference sequence of the *dw3b* gene. The C106T mutation is validated by one p932 M3 line, 932-12D
