# Supplementary material
Source: PubMed Central journal article supplement (PMC3522160)
Supplement: c2e9a1d86eff67767f9b4e1ffada4ea3_genetics.112.144436-8.pdf [file c2e9a1d86eff67767f9b4e1ffada4ea3_genetics.112.144436-8.pdf]

**Table S2 Primers for 454 sequencing**

| Primer name      | Fusion primer (5'-3')          | MID_Tag    | PCR primer (5'-3')     |
|------------------|--------------------------------|------------|------------------------|
| dw3E1F1_SP1_FA   | CCATCTCATCCCTGCGTGTCTCCGACTCAG | ACGAGTGC   | CTAGYAGCGACCCGGAGGAGAT |
| dw3E1F1_SP2_FA   | CCATCTCATCCCTGCGTGTCTCCGACTCAG | AGACGCAC   | CTAGYAGCGACCCGGAGGAGAT |
| dw3E1F1_SP3_FA   | CCATCTCATCCCTGCGTGTCTCCGACTCAG | AGCACTGT   | CTAGYAGCGACCCGGAGGAGAT |
| dw3E1F1_SP4_FA   | CCATCTCATCCCTGCGTGTCTCCGACTCAG | CTCGCGTG   | CTAGYAGCGACCCGGAGGAGAT |
| dw3E1F1_SP5_FA   | CCATCTCATCCCTGCGTGTCTCCGACTCAG | TGATACGT   | CTAGYAGCGACCCGGAGGAGAT |
| dw3E1F1_SP6_FA   | CCATCTCATCCCTGCGTGTCTCCGACTCAG | CATAGTAG   | CTAGYAGCGACCCGGAGGAGAT |
| dw3E1F1_SP7_FA   | CCATCTCATCCCTGCGTGTCTCCGACTCAG | CGAGAGAT   | CTAGYAGCGACCCGGAGGAGAT |
| dw3E1F1_SP8_FA   | CCATCTCATCCCTGCGTGTCTCCGACTCAG | CGTCTAGT   | CTAGYAGCGACCCGGAGGAGAT |
| dw3E1F1_SP9_FA   | CCATCTCATCCCTGCGTGTCTCCGACTCAG | TGTACTAC   | CTAGYAGCGACCCGGAGGAGAT |
| dw3E1F1_SP10_FA  | CCATCTCATCCCTGCGTGTCTCCGACTCAG | CGTAGACT   | CTAGYAGCGACCCGGAGGAGAT |
| dw3E1F1_SP11_FA  | CCATCTCATCCCTGCGTGTCTCCGACTCAG | TACGAGTA   | CTAGYAGCGACCCGGAGGAGAT |
| dw3E1F1_SP12_FA  | CCATCTCATCCCTGCGTGTCTCCGACTCAG | TACTCTCG   | CTAGYAGCGACCCGGAGGAGAT |
| dw3E1F1_SP13_FA  | CCATCTCATCCCTGCGTGTCTCCGACTCAG | TAGAGACG   | CTAGYAGCGACCCGGAGGAGAT |
| dw3E1F1_SP14_FA  | CCATCTCATCCCTGCGTGTCTCCGACTCAG | ACTGTACA   | CTAGYAGCGACCCGGAGGAGAT |
| dw3E1F1_SP15_FA  | CCATCTCATCCCTGCGTGTCTCCGACTCAG | ATAGAGTA   | CTAGYAGCGACCCGGAGGAGAT |
| dw3E1F1_SP16_FA  | CCATCTCATCCCTGCGTGTCTCCGACTCAG | CACGCTAC   | CTAGYAGCGACCCGGAGGAGAT |
| dw3E1F1_SP17_FA  | CCATCTCATCCCTGCGTGTCTCCGACTCAG | CAGTAGAC   | CTAGYAGCGACCCGGAGGAGAT |
| dw3E1F1_SP18_FA  | CCATCTCATCCCTGCGTGTCTCCGACTCAG | CGACGTGA   | CTAGYAGCGACCCGGAGGAGAT |
| dw3E1F1_SP19_FA  | CCATCTCATCCCTGCGTGTCTCCGACTCAG | TCGATCAC   | CTAGYAGCGACCCGGAGGAGAT |
| dw3E1F1_SP20_FA  | CCATCTCATCCCTGCGTGTCTCCGACTCAG | TCGACTA    | CTAGYAGCGACCCGGAGGAGAT |
| dw3E1F1_SP21_FA  | CCATCTCATCCCTGCGTGTCTCCGACTCAG | AGTCGAGA   | CTAGYAGCGACCCGGAGGAGAT |
| dw3E1F1_SP22_FA  | CCATCTCATCCCTGCGTGTCTCCGACTCAG | CGCAGTAC   | CTAGYAGCGACCCGGAGGAGAT |
| dw3E1F1_SP23_FA  | CCATCTCATCCCTGCGTGTCTCCGACTCAG | TATGCTAG   | CTAGYAGCGACCCGGAGGAGAT |
| dw3E1R1a_FB      | CCTATCCCCTGTGTGCCTTGGCAGTCTCAG |            | ACYTGGCCACCAGCCGCACCA  |
| dw3E1R2a_SP1_FA  | CCATCTCATCCCTGCGTGTCTCCGACTCAG | ACGAGTGCGT | TGGCTCCGCGACGACAGCTT   |
| dw3E1R2a_SP2_FA  | CCATCTCATCCCTGCGTGTCTCCGACTCAG | AGACGCACTC | TGGCTCCGCGACGACAGCTT   |
| dw3E1R2a_SP3_FA  | CCATCTCATCCCTGCGTGTCTCCGACTCAG | AGCACTGTAG | TGGCTCCGCGACGACAGCTT   |
| dw3E1R2a_SP4_FA  | CCATCTCATCCCTGCGTGTCTCCGACTCAG | CTCGCGTGTC | TGGCTCCGCGACGACAGCTT   |
| dw3E1R2a_SP5_FA  | CCATCTCATCCCTGCGTGTCTCCGACTCAG | TGATACGTCT | TGGCTCCGCGACGACAGCTT   |
| dw3E1R2a_SP6_FA  | CCATCTCATCCCTGCGTGTCTCCGACTCAG | CATAGTAGTG | TGGCTCCGCGACGACAGCTT   |
| dw3E1R2a_SP7_FA  | CCATCTCATCCCTGCGTGTCTCCGACTCAG | CGAGAGATAC | TGGCTCCGCGACGACAGCTT   |
| dw3E1R2a_SP8_FA  | CCATCTCATCCCTGCGTGTCTCCGACTCAG | CGTCTAGTAC | TGGCTCCGCGACGACAGCTT   |
| dw3E1R2a_SP9_FA  | CCATCTCATCCCTGCGTGTCTCCGACTCAG | TGTACTACTC | TGGCTCCGCGACGACAGCTT   |
| dw3E1R2a_SP10_FA | CCATCTCATCCCTGCGTGTCTCCGACTCAG | CGTAGACTAG | TGGCTCCGCGACGACAGCTT   |
| dw3E1R2a_SP11_FA | CCATCTCATCCCTGCGTGTCTCCGACTCAG | TACGAGTATG | TGGCTCCGCGACGACAGCTT   |
| dw3E1R2a_SP12_FA | CCATCTCATCCCTGCGTGTCTCCGACTCAG | TACTCTCGTG | TGGCTCCGCGACGACAGCTT   |

|                  |                                |             |                        |
|------------------|--------------------------------|-------------|------------------------|
| dw3E1R2a_SP13_FA | CCATCTCATCCCTGCGTGTCTCCGACTCAG | TAGAGACGAG  | TGGCTCCGCGACGACAGCTT   |
| dw3E1R2a_SP14_FA | CCATCTCATCCCTGCGTGTCTCCGACTCAG | ACTGTACAGT  | TGGCTCCGCGACGACAGCTT   |
| dw3E1R2a_SP15_FA | CCATCTCATCCCTGCGTGTCTCCGACTCAG | ATAGAGTACT  | TGGCTCCGCGACGACAGCTT   |
| dw3E1R2a_SP16_FA | CCATCTCATCCCTGCGTGTCTCCGACTCAG | CACGCTACGT  | TGGCTCCGCGACGACAGCTT   |
| dw3E1R2a_SP17_FA | CCATCTCATCCCTGCGTGTCTCCGACTCAG | CAGTAGACGT  | TGGCTCCGCGACGACAGCTT   |
| dw3E1R2a_SP18_FA | CCATCTCATCCCTGCGTGTCTCCGACTCAG | CGACGTGACT  | TGGCTCCGCGACGACAGCTT   |
| dw3E1R2a_SP19_FA | CCATCTCATCCCTGCGTGTCTCCGACTCAG | TCGATCACGT  | TGGCTCCGCGACGACAGCTT   |
| dw3E1R2a_SP20_FA | CCATCTCATCCCTGCGTGTCTCCGACTCAG | TCGCACTAGT  | TGGCTCCGCGACGACAGCTT   |
| dw3E1R2a_SP21_FA | CCATCTCATCCCTGCGTGTCTCCGACTCAG | AGTCGAGAGA  | TGGCTCCGCGACGACAGCTT   |
| dw3E1R2a_SP22_FA | CCATCTCATCCCTGCGTGTCTCCGACTCAG | CGCAGTACGA  | TGGCTCCGCGACGACAGCTT   |
| dw3E1R2a_SP23_FA | CCATCTCATCCCTGCGTGTCTCCGACTCAG | TATGCTAGTA  | TGGCTCCGCGACGACAGCTT   |
| dw3E1F2a_FB      | CCTATCCCCTGTGTGCCCTGGCAGTCTCAG |             | ATGGTGC GGCTGGTGCCARG  |
| dw3E1R4_SP1_FA   | CCATCTCATCCCTGCGTGTCTCCGACTCAG | ACGAGTGC    | GTGACGGGTAGGCGAAGTCAAC |
| dw3E1R4_SP2_FA   | CCATCTCATCCCTGCGTGTCTCCGACTCAG | AGACGCAC    | GTGACGGGTAGGCGAAGTCAAC |
| dw3E1R4_SP3_FA   | CCATCTCATCCCTGCGTGTCTCCGACTCAG | AGCACTGT    | GTGACGGGTAGGCGAAGTCAAC |
| dw3E1R4_SP4_FA   | CCATCTCATCCCTGCGTGTCTCCGACTCAG | CTCGCGTG    | GTGACGGGTAGGCGAAGTCAAC |
| dw3E1R4_SP5_FA   | CCATCTCATCCCTGCGTGTCTCCGACTCAG | TGATACGT    | GTGACGGGTAGGCGAAGTCAAC |
| dw3E1R4_SP6_FA   | CCATCTCATCCCTGCGTGTCTCCGACTCAG | CATAGTAG    | GTGACGGGTAGGCGAAGTCAAC |
| dw3E1R4_SP7_FA   | CCATCTCATCCCTGCGTGTCTCCGACTCAG | CGAGAGAT    | GTGACGGGTAGGCGAAGTCAAC |
| dw3E1R4_SP8_FA   | CCATCTCATCCCTGCGTGTCTCCGACTCAG | CGTCTAGT    | GTGACGGGTAGGCGAAGTCAAC |
| dw3E1R4_SP9_FA   | CCATCTCATCCCTGCGTGTCTCCGACTCAG | TGTACTAC    | GTGACGGGTAGGCGAAGTCAAC |
| dw3E1R4_SP10_FA  | CCATCTCATCCCTGCGTGTCTCCGACTCAG | CGTAGACT    | GTGACGGGTAGGCGAAGTCAAC |
| dw3E1R4_SP11_FA  | CCATCTCATCCCTGCGTGTCTCCGACTCAG | TACGAGTA    | GTGACGGGTAGGCGAAGTCAAC |
| dw3E1R4_SP12_FA  | CCATCTCATCCCTGCGTGTCTCCGACTCAG | TACTCTCG    | GTGACGGGTAGGCGAAGTCAAC |
| dw3E1R4_SP13_FA  | CCATCTCATCCCTGCGTGTCTCCGACTCAG | TAGAGACG    | GTGACGGGTAGGCGAAGTCAAC |
| dw3E1R4_SP14_FA  | CCATCTCATCCCTGCGTGTCTCCGACTCAG | ACTGTACA    | GTGACGGGTAGGCGAAGTCAAC |
| dw3E1R4_SP15_FA  | CCATCTCATCCCTGCGTGTCTCCGACTCAG | ATAGAGTA    | GTGACGGGTAGGCGAAGTCAAC |
| dw3E1R4_SP16_FA  | CCATCTCATCCCTGCGTGTCTCCGACTCAG | CACGCTAC    | GTGACGGGTAGGCGAAGTCAAC |
| dw3E1R4_SP17_FA  | CCATCTCATCCCTGCGTGTCTCCGACTCAG | CAGTAGAC    | GTGACGGGTAGGCGAAGTCAAC |
| dw3E1R4_SP18_FA  | CCATCTCATCCCTGCGTGTCTCCGACTCAG | CGACGTGA    | GTGACGGGTAGGCGAAGTCAAC |
| dw3E1R4_SP19_FA  | CCATCTCATCCCTGCGTGTCTCCGACTCAG | TCGATCAC    | GTGACGGGTAGGCGAAGTCAAC |
| dw3E1R4_SP20_FA  | CCATCTCATCCCTGCGTGTCTCCGACTCAG | TCGCACTA    | GTGACGGGTAGGCGAAGTCAAC |
| dw3E1R4_SP21_FA  | CCATCTCATCCCTGCGTGTCTCCGACTCAG | AGTCGAGA    | GTGACGGGTAGGCGAAGTCAAC |
| dw3E1R4_SP22_FA  | CCATCTCATCCCTGCGTGTCTCCGACTCAG | CGCAGTAC    | GTGACGGGTAGGCGAAGTCAAC |
| dw3E1R4_SP23_FA  | CCATCTCATCCCTGCGTGTCTCCGACTCAG | TATGCTAG    | GTGACGGGTAGGCGAAGTCAAC |
| dw3E1F3a_FB      | CCTATCCCCTGTGTGCCCTGGCAGTCTCAG |             | AAGCTGTCGTGCGGAGCCA    |
| rht1F1_SP1_FA    | CCATCTCATCCCTGCGTGTCTCCGACTCAG | ACGAGTGC GT | AAGGACAAGATGATGGTGCC   |
| rht1F1_SP2_FA    | CCATCTCATCCCTGCGTGTCTCCGACTCAG | AGACGCACTC  | AAGGACAAGATGATGGTGCC   |
| rht1F1_SP3_FA    | CCATCTCATCCCTGCGTGTCTCCGACTCAG | AGCACTGTAG  | AAGGACAAGATGATGGTGCC   |

|                 |                                |            |                        |
|-----------------|--------------------------------|------------|------------------------|
| rht1F1_SP4_FA   | CCATCTCATCCCTGCGTGTCTCCGACTCAG | CTCGCGTGTC | AAGGACAAGATGATGGTGCC   |
| rht1F1_SP5_FA   | CCATCTCATCCCTGCGTGTCTCCGACTCAG | TGATACGTCT | AAGGACAAGATGATGGTGCC   |
| rht1F1_SP6_FA   | CCATCTCATCCCTGCGTGTCTCCGACTCAG | CATAGTAGTG | AAGGACAAGATGATGGTGCC   |
| rht1F1_SP7_FA   | CCATCTCATCCCTGCGTGTCTCCGACTCAG | CGAGAGATAC | AAGGACAAGATGATGGTGCC   |
| rht1F1_SP8_FA   | CCATCTCATCCCTGCGTGTCTCCGACTCAG | CGTCTAGTAC | AAGGACAAGATGATGGTGCC   |
| rht1F1_SP9_FA   | CCATCTCATCCCTGCGTGTCTCCGACTCAG | TGTACTACTC | AAGGACAAGATGATGGTGCC   |
| rht1F1_SP10_FA  | CCATCTCATCCCTGCGTGTCTCCGACTCAG | CGTAGACTAG | AAGGACAAGATGATGGTGCC   |
| rht1F1_SP11_FA  | CCATCTCATCCCTGCGTGTCTCCGACTCAG | TACGAGTATG | AAGGACAAGATGATGGTGCC   |
| rht1F1_SP12_FA  | CCATCTCATCCCTGCGTGTCTCCGACTCAG | TACTCTCGTG | AAGGACAAGATGATGGTGCC   |
| rht1F1_SP13_FA  | CCATCTCATCCCTGCGTGTCTCCGACTCAG | TAGAGACGAG | AAGGACAAGATGATGGTGCC   |
| rht1F1_SP14_FA  | CCATCTCATCCCTGCGTGTCTCCGACTCAG | ACTGTACAGT | AAGGACAAGATGATGGTGCC   |
| rht1F1_SP15_FA  | CCATCTCATCCCTGCGTGTCTCCGACTCAG | ATAGAGTACT | AAGGACAAGATGATGGTGCC   |
| rht1F1_SP16_FA  | CCATCTCATCCCTGCGTGTCTCCGACTCAG | CACGCTACGT | AAGGACAAGATGATGGTGCC   |
| rht1F1_SP17_FA  | CCATCTCATCCCTGCGTGTCTCCGACTCAG | CAGTAGACGT | AAGGACAAGATGATGGTGCC   |
| rht1F1_SP18_FA  | CCATCTCATCCCTGCGTGTCTCCGACTCAG | CGACGTGACT | AAGGACAAGATGATGGTGCC   |
| rht1F1_SP19_FA  | CCATCTCATCCCTGCGTGTCTCCGACTCAG | TCGATCACGT | AAGGACAAGATGATGGTGCC   |
| rht1F1_SP20_FA  | CCATCTCATCCCTGCGTGTCTCCGACTCAG | TCGCACTAGT | AAGGACAAGATGATGGTGCC   |
| rht1F1_SP21_FA  | CCATCTCATCCCTGCGTGTCTCCGACTCAG | AGTCGAGAGA | AAGGACAAGATGATGGTGCC   |
| rht1F1_SP22_FA  | CCATCTCATCCCTGCGTGTCTCCGACTCAG | CGCAGTACGA | AAGGACAAGATGATGGTGCC   |
| rht1F1_SP23_FA  | CCATCTCATCCCTGCGTGTCTCCGACTCAG | TATGCTAGTA | AAGGACAAGATGATGGTGCC   |
| rht1R1_FB       | CCTATCCCCTGTGTGCCTTGGCAGTCTCAG |            | GAAGACGAGGACGAGGAAGA   |
| dw3E2R1_SP1_FA  | CCATCTCATCCCTGCGTGTCTCCGACTCAG | ACGAGTGC   | GCAGCTTGATGATGAATGAGTG |
| dw3E2R1_SP2_FA  | CCATCTCATCCCTGCGTGTCTCCGACTCAG | AGACGCAC   | GCAGCTTGATGATGAATGAGTG |
| dw3E2R1_SP3_FA  | CCATCTCATCCCTGCGTGTCTCCGACTCAG | AGCACTGT   | GCAGCTTGATGATGAATGAGTG |
| dw3E2R1_SP4_FA  | CCATCTCATCCCTGCGTGTCTCCGACTCAG | CTCGCGTG   | GCAGCTTGATGATGAATGAGTG |
| dw3E2R1_SP5_FA  | CCATCTCATCCCTGCGTGTCTCCGACTCAG | TGATACGT   | GCAGCTTGATGATGAATGAGTG |
| dw3E2R1_SP6_FA  | CCATCTCATCCCTGCGTGTCTCCGACTCAG | CATAGTAG   | GCAGCTTGATGATGAATGAGTG |
| dw3E2R1_SP7_FA  | CCATCTCATCCCTGCGTGTCTCCGACTCAG | CGAGAGAT   | GCAGCTTGATGATGAATGAGTG |
| dw3E2R1_SP8_FA  | CCATCTCATCCCTGCGTGTCTCCGACTCAG | CGTCTAGT   | GCAGCTTGATGATGAATGAGTG |
| dw3E2R1_SP9_FA  | CCATCTCATCCCTGCGTGTCTCCGACTCAG | TGTACTAC   | GCAGCTTGATGATGAATGAGTG |
| dw3E2R1_SP10_FA | CCATCTCATCCCTGCGTGTCTCCGACTCAG | CGTAGACT   | GCAGCTTGATGATGAATGAGTG |
| dw3E2R1_SP11_FA | CCATCTCATCCCTGCGTGTCTCCGACTCAG | TACGAGTA   | GCAGCTTGATGATGAATGAGTG |
| dw3E2R1_SP12_FA | CCATCTCATCCCTGCGTGTCTCCGACTCAG | TACTCTCG   | GCAGCTTGATGATGAATGAGTG |
| dw3E2R1_SP13_FA | CCATCTCATCCCTGCGTGTCTCCGACTCAG | TAGAGACG   | GCAGCTTGATGATGAATGAGTG |
| dw3E2R1_SP14_FA | CCATCTCATCCCTGCGTGTCTCCGACTCAG | ACTGTACA   | GCAGCTTGATGATGAATGAGTG |
| dw3E2R1_SP15_FA | CCATCTCATCCCTGCGTGTCTCCGACTCAG | ATAGAGTA   | GCAGCTTGATGATGAATGAGTG |
| dw3E2R1_SP16_FA | CCATCTCATCCCTGCGTGTCTCCGACTCAG | CACGCTAC   | GCAGCTTGATGATGAATGAGTG |
| dw3E2R1_SP17_FA | CCATCTCATCCCTGCGTGTCTCCGACTCAG | CAGTAGAC   | GCAGCTTGATGATGAATGAGTG |
| dw3E2R1_SP18_FA | CCATCTCATCCCTGCGTGTCTCCGACTCAG | CGACGTGA   | GCAGCTTGATGATGAATGAGTG |

|                 |                                |            |                        |
|-----------------|--------------------------------|------------|------------------------|
| dw3E2R1_SP19_FA | CCATCTCATCCCTGCGTGTCTCCGACTCAG | TCGATCAC   | GCAGCTTGATGATGAATGAGTG |
| dw3E2R1_SP20_FA | CCATCTCATCCCTGCGTGTCTCCGACTCAG | TCGCACTA   | GCAGCTTGATGATGAATGAGTG |
| dw3E2R1_SP21_FA | CCATCTCATCCCTGCGTGTCTCCGACTCAG | AGTCGAGA   | GCAGCTTGATGATGAATGAGTG |
| dw3E2R1_SP22_FA | CCATCTCATCCCTGCGTGTCTCCGACTCAG | CGCAGTAC   | GCAGCTTGATGATGAATGAGTG |
| dw3E2R1_SP23_FA | CCATCTCATCCCTGCGTGTCTCCGACTCAG | TATGCTAG   | GCAGCTTGATGATGAATGAGTG |
| dw3E1F6_FB      | CCTATCCCCTGTGTGCCTTGCCAGTCTCAG |            | GTTGACTTCGCCCTACCCGTC  |
| dw3E3F9_SP1_FA  | CCATCTCATCCCTGCGTGTCTCCGACTCAG | ACGAGTGCCT | TGAGCGCGGTCTGCAGCTGT   |
| dw3E3F9_SP2_FA  | CCATCTCATCCCTGCGTGTCTCCGACTCAG | AGACGCACTC | TGAGCGCGGTCTGCAGCTGT   |
| dw3E3F9_SP3_FA  | CCATCTCATCCCTGCGTGTCTCCGACTCAG | AGCACTGTAG | TGAGCGCGGTCTGCAGCTGT   |
| dw3E3F9_SP4_FA  | CCATCTCATCCCTGCGTGTCTCCGACTCAG | CTCGCGTGTC | TGAGCGCGGTCTGCAGCTGT   |
| dw3E3F9_SP5_FA  | CCATCTCATCCCTGCGTGTCTCCGACTCAG | TGATACGTCT | TGAGCGCGGTCTGCAGCTGT   |
| dw3E3F9_SP6_FA  | CCATCTCATCCCTGCGTGTCTCCGACTCAG | CATAGTAGTG | TGAGCGCGGTCTGCAGCTGT   |
| dw3E3F9_SP7_FA  | CCATCTCATCCCTGCGTGTCTCCGACTCAG | CGAGAGATAC | TGAGCGCGGTCTGCAGCTGT   |
| dw3E3F9_SP8_FA  | CCATCTCATCCCTGCGTGTCTCCGACTCAG | CGTCTAGTAC | TGAGCGCGGTCTGCAGCTGT   |
| dw3E3F9_SP9_FA  | CCATCTCATCCCTGCGTGTCTCCGACTCAG | TGTACTACTC | TGAGCGCGGTCTGCAGCTGT   |
| dw3E3F9_SP10_FA | CCATCTCATCCCTGCGTGTCTCCGACTCAG | CGTAGACTAG | TGAGCGCGGTCTGCAGCTGT   |
| dw3E3F9_SP11_FA | CCATCTCATCCCTGCGTGTCTCCGACTCAG | TACGAGTATG | TGAGCGCGGTCTGCAGCTGT   |
| dw3E3F9_SP12_FA | CCATCTCATCCCTGCGTGTCTCCGACTCAG | TACTCTCGTG | TGAGCGCGGTCTGCAGCTGT   |
| dw3E3F9_SP13_FA | CCATCTCATCCCTGCGTGTCTCCGACTCAG | TAGAGACGAG | TGAGCGCGGTCTGCAGCTGT   |
| dw3E3F9_SP14_FA | CCATCTCATCCCTGCGTGTCTCCGACTCAG | ACTGTACAGT | TGAGCGCGGTCTGCAGCTGT   |
| dw3E3F9_SP15_FA | CCATCTCATCCCTGCGTGTCTCCGACTCAG | ATAGAGTACT | TGAGCGCGGTCTGCAGCTGT   |
| dw3E3F9_SP16_FA | CCATCTCATCCCTGCGTGTCTCCGACTCAG | CACGCTACGT | TGAGCGCGGTCTGCAGCTGT   |
| dw3E3F9_SP17_FA | CCATCTCATCCCTGCGTGTCTCCGACTCAG | CAGTAGACGT | TGAGCGCGGTCTGCAGCTGT   |
| dw3E3F9_SP18_FA | CCATCTCATCCCTGCGTGTCTCCGACTCAG | CGACGTGACT | TGAGCGCGGTCTGCAGCTGT   |
| dw3E3F9_SP19_FA | CCATCTCATCCCTGCGTGTCTCCGACTCAG | TCGATCACGT | TGAGCGCGGTCTGCAGCTGT   |
| dw3E3F9_SP20_FA | CCATCTCATCCCTGCGTGTCTCCGACTCAG | TCGCACTAGT | TGAGCGCGGTCTGCAGCTGT   |
| dw3E3F9_SP21_FA | CCATCTCATCCCTGCGTGTCTCCGACTCAG | AGTCGAGAGA | TGAGCGCGGTCTGCAGCTGT   |
| dw3E3F9_SP22_FA | CCATCTCATCCCTGCGTGTCTCCGACTCAG | CGCAGTACGA | TGAGCGCGGTCTGCAGCTGT   |
| dw3E3F9_SP23_FA | CCATCTCATCCCTGCGTGTCTCCGACTCAG | TATGCTAGTA | TGAGCGCGGTCTGCAGCTGT   |
| dw3E3R1_FB      | CCTATCCCCTGTGTGCCTTGCCAGTCTCAG |            | CGTAGGAGGAGTTGCCGCTC   |
| dw3E3F10_SP1_FA | CCATCTCATCCCTGCGTGTCTCCGACTCAG | ACGAGTGC   | TCCGACTTCTCCAACGCCGACT |
| dw3E3F10_SP2_FA | CCATCTCATCCCTGCGTGTCTCCGACTCAG | AGACGCAC   | TCCGACTTCTCCAACGCCGACT |
| dw3E3F10_SP3_FA | CCATCTCATCCCTGCGTGTCTCCGACTCAG | AGCACTGT   | TCCGACTTCTCCAACGCCGACT |
| dw3E3F10_SP4_FA | CCATCTCATCCCTGCGTGTCTCCGACTCAG | CTCGCGTG   | TCCGACTTCTCCAACGCCGACT |
| dw3E3F10_SP5_FA | CCATCTCATCCCTGCGTGTCTCCGACTCAG | TGATACGT   | TCCGACTTCTCCAACGCCGACT |
| dw3E3F10_SP6_FA | CCATCTCATCCCTGCGTGTCTCCGACTCAG | CATAGTAG   | TCCGACTTCTCCAACGCCGACT |
| dw3E3F10_SP7_FA | CCATCTCATCCCTGCGTGTCTCCGACTCAG | CGAGAGAT   | TCCGACTTCTCCAACGCCGACT |
| dw3E3F10_SP8_FA | CCATCTCATCCCTGCGTGTCTCCGACTCAG | CGTCTAGT   | TCCGACTTCTCCAACGCCGACT |
| dw3E3F10_SP9_FA | CCATCTCATCCCTGCGTGTCTCCGACTCAG | TGTACTAC   | TCCGACTTCTCCAACGCCGACT |

---

|                  |                                |            |                        |
|------------------|--------------------------------|------------|------------------------|
| dw3E3F10_SP10_FA | CCATCTCATCCCTGCGTGTCTCCGACTCAG | CGTAGACT   | TCCGACTTCTCCAACGCCGACT |
| dw3E3F10_SP11_FA | CCATCTCATCCCTGCGTGTCTCCGACTCAG | TACGAGTA   | TCCGACTTCTCCAACGCCGACT |
| dw3E3F10_SP12_FA | CCATCTCATCCCTGCGTGTCTCCGACTCAG | TACTCTCG   | TCCGACTTCTCCAACGCCGACT |
| dw3E3F10_SP13_FA | CCATCTCATCCCTGCGTGTCTCCGACTCAG | TAGAGACG   | TCCGACTTCTCCAACGCCGACT |
| dw3E3F10_SP14_FA | CCATCTCATCCCTGCGTGTCTCCGACTCAG | ACTGTACA   | TCCGACTTCTCCAACGCCGACT |
| dw3E3F10_SP15_FA | CCATCTCATCCCTGCGTGTCTCCGACTCAG | ATAGAGTA   | TCCGACTTCTCCAACGCCGACT |
| dw3E3F10_SP16_FA | CCATCTCATCCCTGCGTGTCTCCGACTCAG | CACGCTAC   | TCCGACTTCTCCAACGCCGACT |
| dw3E3F10_SP17_FA | CCATCTCATCCCTGCGTGTCTCCGACTCAG | CAGTAGAC   | TCCGACTTCTCCAACGCCGACT |
| dw3E3F10_SP18_FA | CCATCTCATCCCTGCGTGTCTCCGACTCAG | CGACGTGA   | TCCGACTTCTCCAACGCCGACT |
| dw3E3F10_SP19_FA | CCATCTCATCCCTGCGTGTCTCCGACTCAG | TCGATCAC   | TCCGACTTCTCCAACGCCGACT |
| dw3E3F10_SP20_FA | CCATCTCATCCCTGCGTGTCTCCGACTCAG | TCGACTA    | TCCGACTTCTCCAACGCCGACT |
| dw3E3F10_SP21_FA | CCATCTCATCCCTGCGTGTCTCCGACTCAG | AGTCGAGA   | TCCGACTTCTCCAACGCCGACT |
| dw3E3F10_SP22_FA | CCATCTCATCCCTGCGTGTCTCCGACTCAG | CGCAGTAC   | TCCGACTTCTCCAACGCCGACT |
| dw3E3F10_SP23_FA | CCATCTCATCCCTGCGTGTCTCCGACTCAG | TATGCTAG   | TCCGACTTCTCCAACGCCGACT |
| dw3E3R10_FB      | CCTATCCCCTGTGTGCCTTGGCAGTCTCAG |            | GATGGCGGARCGCACGTTCT   |
| dw3E3F11_SP1_FA  | CCATCTCATCCCTGCGTGTCTCCGACTCAG | ACGAGTGCCT | GCATCTCGGTGATCGTGCAG   |
| dw3E3F11_SP2_FA  | CCATCTCATCCCTGCGTGTCTCCGACTCAG | AGACGACTC  | GCATCTCGGTGATCGTGCAG   |
| dw3E3F11_SP3_FA  | CCATCTCATCCCTGCGTGTCTCCGACTCAG | AGCACTGTAG | GCATCTCGGTGATCGTGCAG   |
| dw3E3F11_SP4_FA  | CCATCTCATCCCTGCGTGTCTCCGACTCAG | CTCGCGTGTC | GCATCTCGGTGATCGTGCAG   |
| dw3E3F11_SP5_FA  | CCATCTCATCCCTGCGTGTCTCCGACTCAG | TGATACGTCT | GCATCTCGGTGATCGTGCAG   |
| dw3E3F11_SP6_FA  | CCATCTCATCCCTGCGTGTCTCCGACTCAG | CATAGTAGTG | GCATCTCGGTGATCGTGCAG   |
| dw3E3F11_SP7_FA  | CCATCTCATCCCTGCGTGTCTCCGACTCAG | CGAGAGATAC | GCATCTCGGTGATCGTGCAG   |
| dw3E3F11_SP8_FA  | CCATCTCATCCCTGCGTGTCTCCGACTCAG | CGTCTAGTAC | GCATCTCGGTGATCGTGCAG   |
| dw3E3F11_SP9_FA  | CCATCTCATCCCTGCGTGTCTCCGACTCAG | TGTACTACTC | GCATCTCGGTGATCGTGCAG   |
| dw3E3F11_SP10_FA | CCATCTCATCCCTGCGTGTCTCCGACTCAG | CGTAGACTAG | GCATCTCGGTGATCGTGCAG   |
| dw3E3F11_SP11_FA | CCATCTCATCCCTGCGTGTCTCCGACTCAG | TACGAGTATG | GCATCTCGGTGATCGTGCAG   |
| dw3E3F11_SP12_FA | CCATCTCATCCCTGCGTGTCTCCGACTCAG | TACTCTCGTG | GCATCTCGGTGATCGTGCAG   |
| dw3E3F11_SP13_FA | CCATCTCATCCCTGCGTGTCTCCGACTCAG | TAGAGACGAG | GCATCTCGGTGATCGTGCAG   |
| dw3E3F11_SP14_FA | CCATCTCATCCCTGCGTGTCTCCGACTCAG | ACTGTACAGT | GCATCTCGGTGATCGTGCAG   |
| dw3E3F11_SP15_FA | CCATCTCATCCCTGCGTGTCTCCGACTCAG | ATAGAGTACT | GCATCTCGGTGATCGTGCAG   |
| dw3E3F11_SP16_FA | CCATCTCATCCCTGCGTGTCTCCGACTCAG | CACGCTACGT | GCATCTCGGTGATCGTGCAG   |
| dw3E3F11_SP17_FA | CCATCTCATCCCTGCGTGTCTCCGACTCAG | CAGTAGACGT | GCATCTCGGTGATCGTGCAG   |
| dw3E3F11_SP18_FA | CCATCTCATCCCTGCGTGTCTCCGACTCAG | CGACGTGACT | GCATCTCGGTGATCGTGCAG   |
| dw3E3F11_SP19_FA | CCATCTCATCCCTGCGTGTCTCCGACTCAG | TCGATCACGT | GCATCTCGGTGATCGTGCAG   |
| dw3E3F11_SP20_FA | CCATCTCATCCCTGCGTGTCTCCGACTCAG | TCGACTAGT  | GCATCTCGGTGATCGTGCAG   |
| dw3E3F11_SP21_FA | CCATCTCATCCCTGCGTGTCTCCGACTCAG | AGTCGAGAGA | GCATCTCGGTGATCGTGCAG   |
| dw3E3F11_SP22_FA | CCATCTCATCCCTGCGTGTCTCCGACTCAG | CGCAGTACGA | GCATCTCGGTGATCGTGCAG   |
| dw3E3F11_SP23_FA | CCATCTCATCCCTGCGTGTCTCCGACTCAG | TATGCTAGTA | GCATCTCGGTGATCGTGCAG   |
| dw3E3R11_FB      | CCTATCCCCTGTGTGCCTTGGCAGTCTCAG |            | GGAGACCATGAGCACCATGAAG |

---
