# Supplementary material
Source: PubMed Central journal article supplement (PMC3522160)
Supplement: d60688dffdc880a661bf0af8d7f6fdf1_genetics.112.144436-9.pdf [file d60688dffdc880a661bf0af8d7f6fdf1_genetics.112.144436-9.pdf]

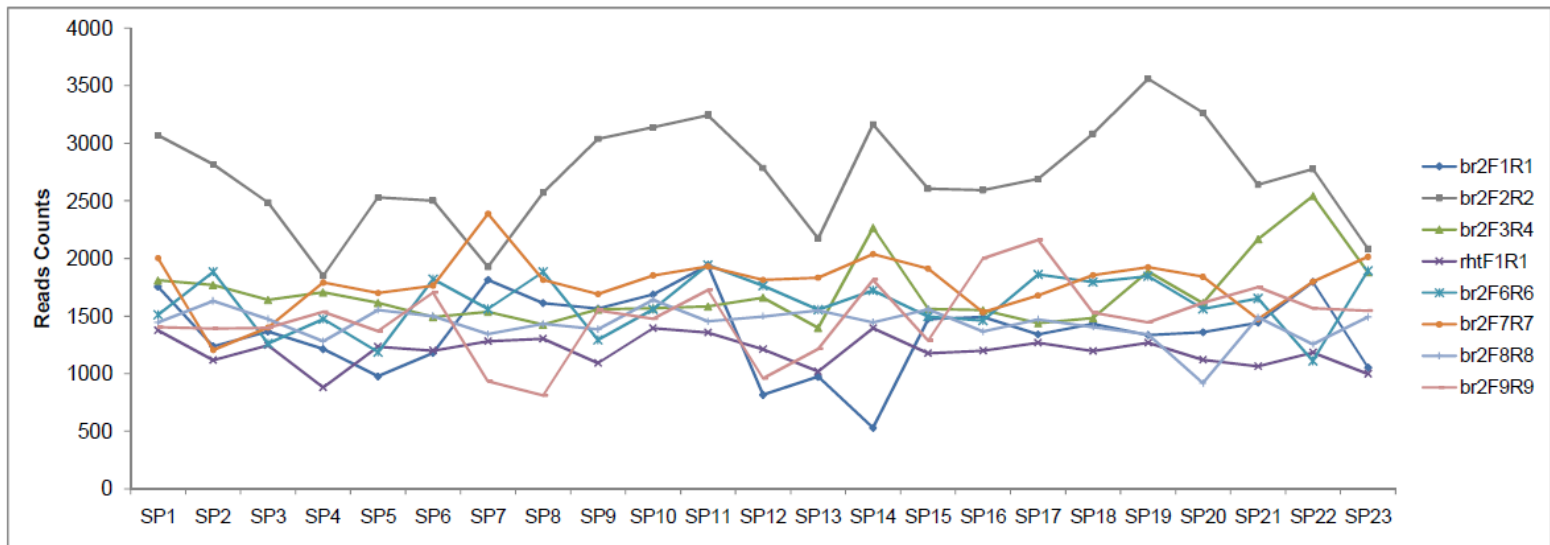

**Figure S1** 454 read distribution of 8 amplicons in the 23 superpools. X axis represents 23 superpools from the 21,210 EMS mutagenized *tef* lines. Y axis represents the number of reads in the superpools. 8 different signs represent 8 amplicons. Among them, *rhtF1R1* was amplified from *rht1* genes and the other 7 were amplified from *dw3* genes
