# Supplementary material
Source: PubMed Central journal article supplement (PMC3522160)

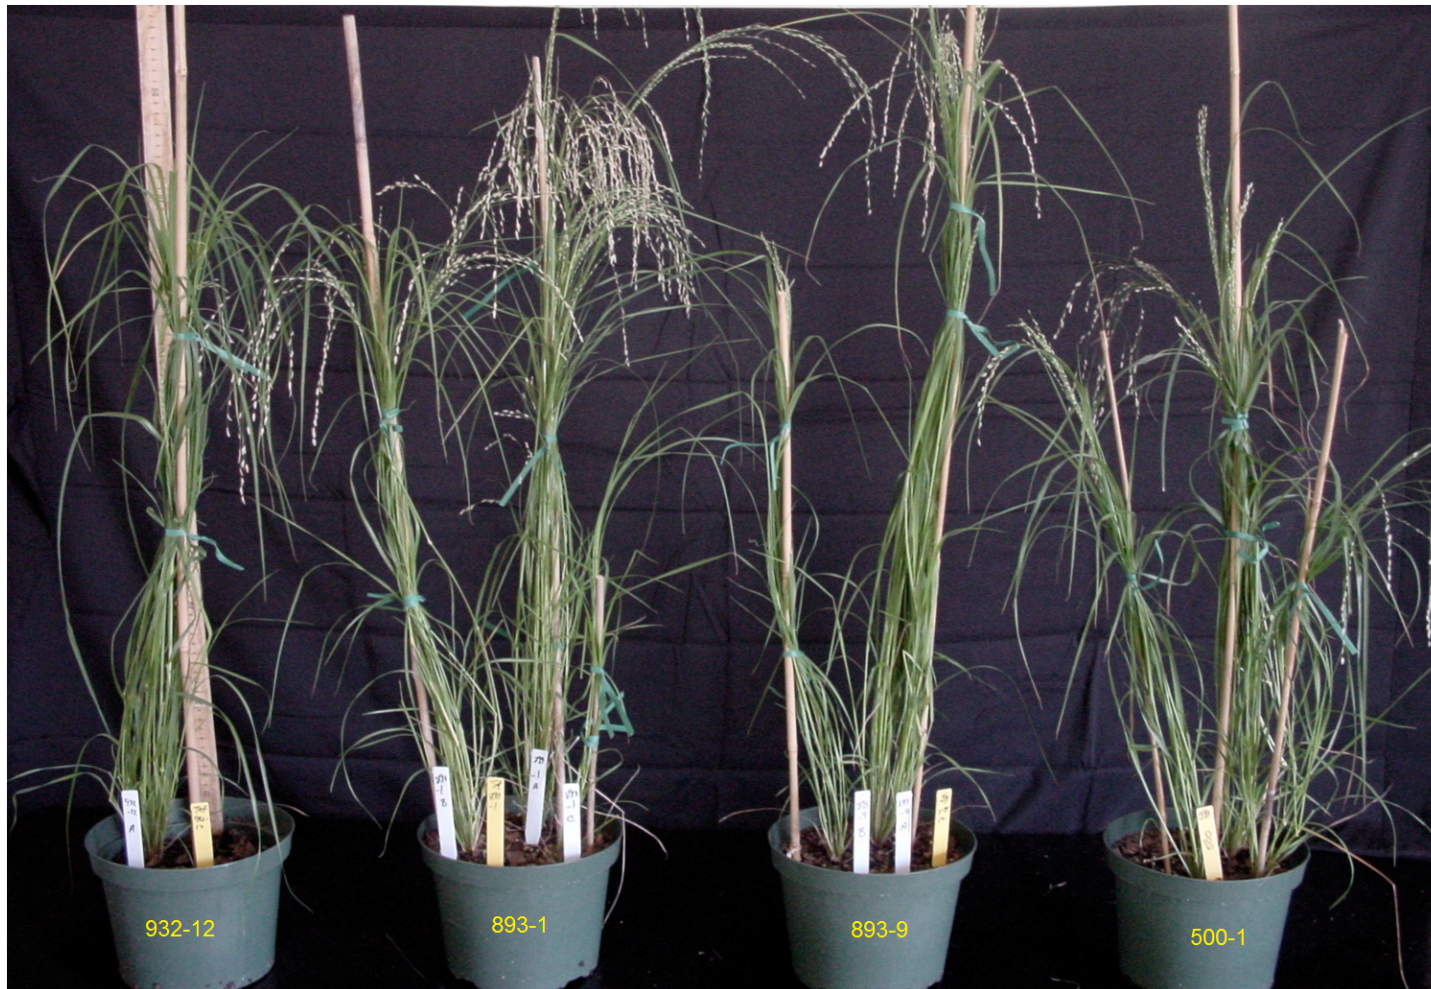

**Figure S3** Phenotypes of *dw3* homologue mutants in M3 lines of *tef* (500-1: control; 893-1 and 893-9: G742A mutants; 932-12: C106T mutant)

Supplement: 74686bb76b34bd204b5282dd917e5930_genetics.112.144436-5.pdf [file 74686bb76b34bd204b5282dd917e5930_genetics.112.144436-5.pdf]
